# Minimal Tool Set for a Prokaryotic Circadian Clock

Nicolas M Schmelling<sup>1</sup>, Anika Wiegard<sup>1</sup>, Robert Lehmann<sup>2</sup>, Paushali Chaudhury<sup>3</sup>,  
Christian Beck<sup>2</sup>, Sonja V Albers<sup>3</sup>, and Ilka M Axmann\*<sup>1</sup>

<sup>1</sup>Institute for Synthetic Microbiology, Cluster of Excellence on Plant Sciences (CEPLAS), Heinrich-Heine-University Düsseldorf, Universitätsstr. 1, 40225 Düsseldorf, Germany

<sup>2</sup>Institute for Theoretical Biology, Humboldt University Berlin, Invalidenstr. 43, 10115, Berlin, Germany

<sup>3</sup>Molecular Biology of Archaea, University of Freiburg, Institute of Biology II, Schänzlestr.1, 79104 Freiburg, Germany

September 13, 2016

## Abstract

Circadian clocks can be found in almost all organisms including photosynthetic Cyanobacteria, whereby large diversity exists within the protein components involved. In the model cyanobacterium *Synechococcus elongatus* PCC 7942 circadian rhythms are driven by a unique KaiABC protein clock, which is embedded in a network of input and output factors. Homologous proteins to the *Synechococcus elongatus* PCC 7942 clock components have been observed in Bacteria and Archaea, where evidence for circadian behavior in these domains is accumulating. However, interaction and function of non-cyanobacterial Kai-proteins as well as homologous input and output components remain mainly unclear.

Using a universal BLAST analyses, we identified putative KaiC-based timing systems in organisms outside as well as variations within Cyanobacteria. A systematic analyses of publicly available microarray data elucidated interesting variations in circadian gene expression between different cyanobacterial strains, which might be correlated to the diversity of genome encoded clock components. Based on statistical analyses of co-occurrences of the clock component homologous to *Synechococcus elongatus* PCC 7942, we propose putative networks of reduced and fully functional clock systems. Further, we studied KaiC sequence conservation to determine functionally important regions of diverged KaiC homologs. Biochemical characterization of exemplary cyanobacterial KaiC proteins as well as homologs from two thermophilic Archaea demonstrated that kinase activity is always present. However, a KaiA-mediated phosphorylation is only detectable in KaiC1 orthologs. Our analysis of 11,264 genomes clearly demonstrates that components of the *Synechococcus elongatus* PCC 7942 circadian clock are present in Bacteria and Archaea. However, all components are less abundant in other organisms than Cyanobacteria and KaiA, Pex, LdpA, and CdpA are only present in the latter. Thus, only reduced KaiBC-based or even simpler, solely KaiC-based timing systems might exist outside of the cyanobacterial phylum, which might be capable of driving diurnal oscillations.

## 1 Introduction

2 Life on Earth is under the influence of changing environmental conditions, which not only pose a chal-  
3 lenge to organisms, but also present a chance of adaptation and therefore a possible fitness advantage over  
4 competitors [1, 2]. Using inner timing systems organisms can coordinate their physiology and behavior  
5 according to the daily recurring changes. Simple timing systems work in an hour glass like fashion and  
6 need to be reset every day by environmental stimuli, whereas true circadian clocks generate self-sustained  
7 and temperature-compensated 24-hour rhythms of biological activities [3, 4].

8 Circadian clocks are found in many eukaryotes such as algae, plants and mammals [5]. Even though  
9 circadian clocks seem like a conserved trait in evolution, differences in the protein components, involved  
10 in circadian timing, suggest a convergent evolution of timing mechanisms [5]. For many years it has been

---

\*Ilka.Axmann@hhu.de

11 believed that something as complex as a circadian clock could not have been evolved in unicellular organ-  
12 isms like prokaryotes [5, 6, 7]. However, the existence of temperature compensated 24-hour rhythms of  
13 cell division in *Synechococcus* sp. WH 7803 and circadian nitrogen fixation in *Cyanothece* sp. PCC 8801  
14 proved otherwise [8, 9, 10, 11, 12]. The molecular basis of the cyanobacterial circadian clock was inten-  
15 sively investigated in *Synechococcus elongatus* PCC 7942 (hereafter *Synechococcus* 7942), where the core  
16 clockwork resembles a posttranslational oscillator [13, 14, 15]. In contrast, eukaryotic circadian rhythms  
17 are believed to be mainly based on transcriptional-translational feedback loops. However, findings on  
18 post-translational systems are accumulating [16, 17, 18] and might exist also in Archaea [16].  
19 Light is assumed to be the driving stimulus in circadian clock entrainment [19]. In *Synechococcus* 7942,  
20 contrary to eukaryotic circadian clock systems, a photoreceptor in the input pathway of the clock could  
21 not be detected thus far. Instead, *Synechococcus* 7942 cells sense light indirectly through the redox and  
22 energy state of the cell [20]. Here, two metabolic components are considered to play a major role [21]:  
23 The ATP to ADP ratio and the redox state of the plastoquinone (PQ) pool [22, 23]. The core of the  
24 circadian clock in *Synechococcus* 7942 consists of three proteins KaiA, KaiB and KaiC. KaiC monomers  
25 are composed of two domains, which assemble into two hexameric rings [24, 25]. The C-terminal ring is  
26 capable of autophosphorylation and -dephosphorylation [26, 27]. KaiC phosphorylation is stimulated by  
27 the interaction with KaiA [28, 29], and additionally, affected by the ATP/ADP ratio of the cell [30]. KaiB  
28 inhibits the activating effect of KaiA and initializes dephosphorylation [31]. Altogether, KaiC hexamers  
29 phosphorylate and dephosphorylate rhythmically during the course of a day. The binding of oxidized  
30 quinones to KaiA has been suggested to stop the clock directly by causing KaiA aggregation [32, 33].  
31 The KaiABC core clock is embedded into a network of input and output pathways. The input factors  
32 that interact with the core clock are Pex, LdpA, PrkE, NhtA, IrcA, CdpA [20, 34, 35, 36, 37, 38]. Output  
33 factors are SasA, LabA, LalA, CpmA, Crm, RpaA, and RpaB, as well as CikA, which is functioning both  
34 in input and output pathway of the circadian clock [39, 40, 41, 42, 43, 44, 45, 46, 47, 48, 49, 50, 51].  
35 Sequence analysis indicated that at least three different types of timing systems are present in Cyanobac-  
36 teria, (i) a KaiABC-based system as in *Synechococcus* 7942, (ii) a reduced system with a KaiBC core  
37 and a reduced set of input/output factors as in *Prochlorococcus* and (iii) a reduced KaiABC system as  
38 in *Synechococcus* sp. WH 8102, which despite including all three *kai* genes, has the same input/output  
39 factors as the reduced KaiBC system [52]. Furthermore, multiple *kai* genes can exist in an organism  
40 [53, 54]. In *Synechocystis* sp. PCC 6803 (hereafter *Synechocystis* 6803) for example, three copies of both  
41 *kaiB* and *kaiC* are found. Besides the core clock components, KaiA, KaiB1 and KaiC1, most similar to  
42 the *kai* genes of *Synechococcus* 7942 [55, 56], KaiB3 and KaiC3 are thought to function as fine tuning  
43 factors for the circadian clock in *Synechocystis* 6803, whereas no circadian function has been found for  
44 KaiB2 and KaiC2 [56]. However, recently *kaiC2*-dependent adaptive growth and diurnal rhythms of  
45 nitrogen fixation were observed in *Rhodospseudomonas palustris* [57]. Homologs of *kaiB* and *kaiC* genes  
46 also exist in other Bacteria and even Archaea, where a shortend KaiC most often resembles only one  
47 domain [53]. An archaeal one-domain KaiC homolog was shown to form a hexameric ring, similar to the  
48 two duplicated domains of *Synechococcus* 7942 KaiC [58]. In *Haloferax volcanii* the transcripts of four  
49 *kaiC* homologs display diurnal accumulation profiles [59]. However, the function of non-cyanobacterial  
50 Kai-proteins is mainly unclear, so far. Although some of the input- and output factors were also found  
51 in prokaryotes other than cyanobacteria [49, 52, 60, 61], it is unknown whether the Kai homologs outside  
52 the cyanobacterial phylum or the additional cyanobacterial Kai homologs interact with (other) in- and  
53 output factors.

54 In this study, we performed BLAST analyses to first identify possible KaiC-based timing systems in organ-  
55 isms outside of Cyanobacteria and second to explore variations in circadian clocks within Cyanobacteria.  
56 Further, we examined variations in circadian gene expression between different cyanobacterial strains us-  
57 ing microarray data. Together, this aims at decoding the correlation between Kai proteins and additional  
58 clock components. Based on the co-occurrence of clock components known from *Synechococcus* 7942 we  
59 propose putative networks of reduced and fully functional clock systems. Further, we used the sequence  
60 information of KaiC and its homologs in Cyanobacteria to determine the similarities at important sites of  
61 the protein. We chose cyanobacterial KaiC proteins as well as homologs from two thermophilic Archaea  
62 and demonstrated that kinase activity is always present. However, a KaiA-mediated phosphorylation is  
63 only detectable in cyanobacterial KaiC1 homologs.

## 64 Materials and Methods

### 65 Programming languages

66 The programming languages Python (version 3.5.1) and R (version 3.2.3) were used in this work. The  
67 processing and analysis of the microarray time series datasets was performed using R. Regarding the  
68 distribution analysis, the Biopython project ([62]; version 1.66) was used to download from GenBank  
69 as well as to work with FASTA files. Besides Biopython, the Python packages: IPython ([63] version  
70 4.1.1) as an interactive Python environment with the IPython notebook; numpy and scipy ([64]; version  
71 1.10.4, version 0.17.0) for numerical operations; matplotlib ([65]; version 1.5.1) for data visualization; and  
72 pandas ([66]; version 0.17.1) for data analyses were used. The code necessary to reproduce the analyses  
73 is available on GitHub ([https://github.com/schmelling/reciprocal\\_BLAST](https://github.com/schmelling/reciprocal_BLAST)).

### 74 Reciprocal BLAST and NCBI

75 The coding sequences of all entries in the genbank protein database [67], which were labeled as "Complete  
76 Genome" or "Chromosome", were downloaded from the NCBI FTP server (version May 2016). These  
77 sequences, including the coding sequences of *Synechococcus elongatus* PCC 7942 and *Synechocystis* sp.  
78 PCC 6803, were used to construct a custom protein database for the homology search. Further, pro-  
79 tein sequences of the 23 clock related proteins (Table S1), from *Synechococcus elongatus* PCC 7942 and  
80 *Synechocystis* sp. PCC 6803, respectively, were checked against the entries in the Cyanobase Database  
81 to ensure correctness [68] (version May 2016). These 23 protein sequences were used as queries for a  
82 search of homologs within the custom protein database, applying the standalone version of BLASTP  
83 2.2.30+ [69] (May 2016) with standard parameter (wordsize: 3, substitution matrix: BLOSUM62). The  
84 10,000 best hits with an e-value of  $10^{-5}$  or lower were filtered for further analyses. The first BLAST run  
85 returned circa 65,000 hits for all 23 cyanobacterial proteins combined.

86 These hits were used as queries for a second reverse BLASTP run, searching for homologs in *Synechococ-*  
87 *cus* 7942 or *Synechocystis* 6803 genomes using the same parameters as above with an altered e-value of  
88 10. Only hits with the original query protein as best reversal hit were accepted for further analyses, thus  
89 minimizing false positive results.

90 Raw and processed data is available on figshare (<https://dx.doi.org/10.6084/m9.figshare.3823902.v2>,  
91 <https://dx.doi.org/10.6084/m9.figshare.3823899.v2>).

### 92 Testing of co-occurrence

93 Co-occurrence of circadian clock proteins was examined by using the right-sided Fisher's exact test [70].  
94 For each of the 94 cyanobacterial strains, all identified homologous clock genes were gathered into one  
95 set. The phylogenetic distribution of cyanobacteria in the NCBI genbank database is very imbalanced.  
96 Some genera (e.g. *Prochlorococcus* and *Synechococcus*) are covered better than others. To avoid selection  
97 bias, we removed sets with identical combinations of genes, resulting in 69 unique clock systems. Null  
98 hypothesis of Fisher's exact test is a pairwise independent distribution of the proteins across all clock  
99 systems. P-values were corrected for multiple testing after Benjamini-Hochberg [71] with an excepted  
100 false discovery rate of  $10^{-2}$ . We denote that due to the nature of statistical testing, proteins appearing in  
101 almost all clock systems are always virtually independent to others. All proteins were clustered according  
102 to their corrected p-values.

### 103 Microarray analysis

104 The diurnal expression program of six cyanobacterial strains was probed using microarray time series  
105 datasets (Table S3). Unfortunately, the data for the two reported *Synechocystis* 6803 experiments by  
106 Labiosa and colleagues [72] and Kucho and coworkers [73] could not be obtained. The study by Toepel  
107 and coworkers [74] had to be discarded due to the employed ultradian light cycles (6:6 LD cycles). The  
108 *Synechocystis* 6803 datasets, the *Synechococcus* 7942 dataset of Ito and colleagues, and the *Anabaena*  
109 sp. PCC 7120 dataset were l2m transformed, while the *Cyanothece* ATCC 51142 datasets are only  
110 available after transformation. The two biological replicates of the *Anabaena* sp. PCC 7120 dataset were  
111 concatenated for the following analyses [75], similar to the *Synechocystis* 6803 dataset [76]. Expression  
112 profiles were smoothed using a Savitzky-Golay lowpass filter, as proposed by Yang and colleagues [77],  
113 in order to remove pseudo peaks prior to the detection of periodic genes. Diurnally oscillating expression  
114 profiles were detected using harmonic regression analysis [78]. The derived p-values for each gene is  
115 based on the assumption of a linear background profile as compared to the sinoidal foreground model.  
116 After multiple hypothesis testing correction according to Benjamini-Hochberg [71], all datasets yielded

117 significantly oscillating genes ( $q \leq 0.05$ ) except for *Microcystis aeruginosa* PCC 7806, with 7 samples the  
118 shortest dataset.

### 119 Multiple sequence alignment

120 Multiple sequence alignments were constructed by the standalone version of CLUSTAL Omega 1.2.1-1  
121 [79] using 20 iterations, while only one iteration was used to construct the guide tree (May 2016). The  
122 sequences for the alignments were obtained from the processed data generated, as described in the method  
123 section "Reciprocal BLAST and NCBI". Afterwards the alignments were adjusted to *Synechococcus* 7942  
124 sequence with Jalview [80] and edited multialignments were used to create WebLogos [81].

### 125 Cloning, heterologous expression and purification of Kai proteins

126 To express either GST-fused or full length KaiC1 proteins from *Synechocystis* sp. PCC 6714, *Nostoc*  
127 *punctiforme* ATCC 29133, *Cyanothece* sp. PCC 7424 as well as KaiC3 from *Cyanothece* sp. PCC  
128 7424, *Microcystis aeruginosa* PCC 7806, *Pycrococcus horikoshii* OT3 PH0833, and *Thermococcus litoralis*  
129 DSM5473, the respective *kaiC* genes were amplified by PCR from genomic wildtype DNA. The ORFs and  
130 primers are listed in Table S4. Amplified sequences were ligated into BamHI and NotI restriction sites  
131 of the plasmid pGEX-6P-1 (GE Healthcare). For *P.horikoshii* and *T.litoralis* KaiC3 the amplified PCR  
132 products were ligated into pETDuet1 Vector using BamHI/HindIII and PstI/HindIII restriction enzymes  
133 in MCS1 respectively. *Escherichia coli* DH5 $\alpha$  or BL21 (DE3) cells were transformed with the resulting  
134 plasmids (pGEX-kaiC1-*Sy6714*, pGEX-kaiC1-*Npun29133*, pGEX-kaiC1-*Cy7424*, pGEX-kaiC3-*Cy7424*,  
135 pGEX-kaiC3-*Mic7806*, pSVA3151, pSVA3152). For GST-fused expression of KaiA-7942 and KaiC-7942  
136 pGEX derivatives, kindly provided by T. Kondo (Nagoya University, Japan), were used. Expression of  
137 GST-Kai proteins occurred at 37 °C and 200 rpm in Terrific broth medium containing 100  $\mu$ g ampicillin  
138 ml<sup>-1</sup>. GST-KaiA-7942 expression was induced with 1 mM isopropyl  $\beta$ -D-thiogalactopyranoside (IPTG)  
139 and carried out overnight, whereas GST-KaiC homologs were expressed for 72 hours without induction.  
140 Cells were harvested and lysed in ice-cold extraction buffer (50 mM Tris/HCl (pH 8), 150 mM NaCl, 0.5  
141 mM EDTA, 1 mM DTT, 5 mM MgCl<sub>2</sub> and 1 mM ATP). Recombinant GST-Kai proteins were affinity  
142 purified using Protino Glutathione Agarose 4B (Macherey–Nagel) as described in Wiegard and colleagues  
143 [55]. During the procedure the GST-tag was removed with PreScission protease in cleavage buffer (50  
144 mM Tris/HCl (pH 8), 150 mM NaCl, 1 mM EDTA, 1 mM DTT, 5 mM MgCl<sub>2</sub> and 0.5 mM ATP).  
145 Homogeneity of the recombinant proteins was controlled by separating them via SDS-PAGE. If it was  
146 not sufficient, proteins were further purified by anion-exchange chromatography using a MonoQ 5/50 GL  
147 or ResourceQ column (GE Healthcare). After dialysis in reaction buffer (20 mM Tris/HCl (pH 8), 150  
148 mM NaCl, 0.5 mM EDTA, 5 mM MgCl<sub>2</sub>, and 1 mM ATP) protein concentration was determined using  
149 infrared spectroscopy (Direct detect, Merck Millipore). For full-length KaiC3 homologs, *E. coli* BL21  
150 (DE3) RIL cells were transformed with pSVA3151 (*P.horikoshii*) and pSVA3152 (*T.litoralis*), and grown  
151 as preculture overnight at 37 °C in LB medium containing ampicillin (50  $\mu$ g ml<sup>-1</sup>) and chloramphenicol  
152 (34  $\mu$ g ml<sup>-1</sup>). Fresh medium containing antibiotic was inoculated with 0.1 % preculture and grown at  
153 37 °C to an OD<sub>600</sub> of 0.7. After induction with 0.3 mM of IPTG, growth was continued for 16 hours  
154 at 16 °C. Cells were collected by centrifugation, frozen in liquid nitrogen, and, after storage at -80 °C,  
155 resuspended in 50 ml lysis buffer (50 mM Hepes-NaOH, pH 7.2, 150 mM NaCl) containing Complete  
156 EDTA-free protease inhibitor cocktail (Roche) together with DNase I and lysed by sonication. Cell  
157 debris were removed by centrifugation at 4 °C for 30 min at 20,000 x g. Further Ni-NTA (Sigma Aldrich,  
158 Seelze, Germany) based purification was performed using columns equilibrated in purification buffer (50  
159 mM Hepes-NaOH, pH 7.2, 150 mM NaCl). For the removal of unspecifically bound protein columns  
160 were washed with 15 column volumes of equilibration buffer including 10 mM imidazole. *T.litoralis*  
161 KaiC3 was eluted in the same buffer with 150 mM imidazole containing equilibration buffer, whereas for  
162 *P.horikoshii* KaiC3 the elution was carried out in 20 mM MES pH 6.2, 150 mM NaCl, 150 mM imidazole  
163 as this protein is stable in low pH buffer. Further purification of *T.litoralis* KaiC3 was achieved by size  
164 exclusion chromatography using Superdex 200 10/300 GL. *P.horikoshii* KaiC3 was incubated at 50 °C for  
165 20 min and centrifuged for 15 min at 10,000 x g. Subsequently, the supernatant was dialyzed overnight  
166 against 20 mM MES pH 6.2, 150 mM NaCl buffer. As a quality control, proteins were separated via  
167 SDS-PAGE and pure proteins were frozen in liquid nitrogen and kept at -80 °C.

### 168 In vitro phosphorylation assays

169 To investigate KaiA dependent phosphate uptake 12  $\mu$ g of KaiC-7942, KaiC1-*Sy6714*, KaiC1-*N29133*,  
170 KaiC1-*Cy7424*, KaiC3-*Cy7424*, KaiC3-*Mic7806*, KaiC3-*T.lit* or KaiC3-*P.hor* were mixed with 10  $\mu$ Ci  
171  $\gamma$ -P<sup>32</sup>-ATP in 60  $\mu$ l Tris reaction buffer (20 mM Tris/HCl (pH 8), 150 mM NaCl, 0.5 mM EDTA, 5



172 mM MgCl<sub>2</sub>, 1 mM ATP) in the presence or absence of 6 μg KaiA-7942. 10 μl aliquots were taken after  
173 0, 0.75, 1.5, 3 and 22 hours of incubation at 30 °C and reaction was stopped by adding SDS-sample  
174 buffer. Proteins were separated in high-resolution polyacrylamide gels (10 % T, 0.67 % C) by SDS-PAGE  
175 (modified from [82]), stained with Coomassie brilliant blue and subjected to autoradiography. Signals  
176 were analyzed using a Fujifilm FLA-3000 (FUJIFILM). To analyze in vitro phosphorylation of KaiC3-*T.lit*  
177 and KaiC3-*P.hor* at higher temperatures, the recombinant proteins were incubated with 10 μCi γ-P<sup>32</sup>-  
178 ATP in HEPES reaction buffer (50 mM HEPES (pH 7.2), 150 mM NaCl, 5 mM MgCl<sub>2</sub>, 1 mM ATP)  
179 or MES reaction buffer (50 mM MES (pH 6), 150 mM NaCl, 5 mM MgCl<sub>2</sub>, 1 mM ATP), respectively,  
180 at 75 °C. After 0, 5, 10 and 15 minutes 10 μl aliquots were taken and analyzed by SDS-PAGE and  
181 autoradiography as described above.

## 182 Results and Discussion

### 183 Most complete set of circadian clock orthologs in Cyanobacteria

184 Circadian rhythms are reported for many Cyanobacteria and first sequence analyses revealed that the  
185 core genes, known from *Synechococcus* 7942, are conserved in almost all cyanobacterial species [4, 53,  
186 55, 83]. Even though daily rhythms seem to be conserved in Cyanobacteria, composition and quantity  
187 of corresponding genes on the genome level show high variability [54]. Dvornyk and colleagues first  
188 attempted to describe the variety of cyanobacterial core circadian clock systems in 2003 [53]. Since then,  
189 the amount and depth of sequencing data increased manifold, which allowed us to perform a detailed  
190 analysis of the KaiC-based circadian clock including the input and output pathways. The circadian clock  
191 proteins of *Synechococcus* 7942 (Table S1) and the KaiB and KaiC homologs from *Synechocystis* 6803  
192 (Table S1) were the basis of our analysis. Their protein sequences served as base for a reciprocal best  
193 hit BLAST analysis. Organisms with at least one homolog to KaiC were retained for further analysis.  
194 This stringent filter was essential since KaiC represents the core of the circadian clock in *Synechococcus*  
195 7942. These organisms were grouped by their corresponding genus for a first overview of the homolog  
196 distribution (Fig. 1A). We found homologs in Cyanobacteria, Proteobacteria, Archaea, as well as other  
197 Bacteria such as *Chloroflexi*. This finding is in good agreement with previous studies [53, 55, 84]. However,  
198 our comprehensive study identified a plethora of new bacterial and archaeal genera harboring homologs  
199 to the circadian clock genes (Fig. 1A). Nevertheless, Cyanobacteria represent the phylum with the highest  
200 degree of sequence similarity and integrity of the system followed by Bacteria, mostly Proteobacteria. In  
201 Archaea, homologs to only a fraction of core genes could be identified (Fig. 1A).

### 202 Core circadian clock factors KaiB and KaiC beyond the phylum of Cyanobacteria

203 Four out of seventeen studied factors are exclusively found in Cyanobacteria (Fig. 1A). One of these  
204 factors is KaiA, as previously reported in studies with a smaller sample size [53, 84]. However, even  
205 some Cyanobacteria, like *Candidatus Atelocyanobacterium thalassa* (previously named Cyanobacterium  
206 UCYN-A), and all representatives from the genus *Prochlorococcus* lack *kaiA* (Fig. 1A) [54]. Interestingly,  
207 multiple copies of *kaiA* in a single cyanobacterial genome could not be identified. This is of special interest,  
208 because we could observe strong sequence length variations for KaiA (Fig. 5A, C) and multiple copies for  
209 the other core proteins KaiB and KaiC have been reported (Fig. 1B) [53, 54, 55]. With the *kaiA*-lacking  
210 *Candidatus Atelocyanobacterium thalassa* and a *kaiA*-containing cyanobacterial endosymbiont [85] only  
211 two out of 94 studied Cyanobacteria do not contain a *kaiB*, whereas a third of the cyanobacterial genera  
212 contain multiple copies of *kaiB* and *kaiC*, which are also homologs to other known KaiB or KaiC variants  
213 (Fig. 1B, C). There are a few exceptional cyanobacteria like *Gloeobacter violaceus* [86], which are even  
214 lacking the *kaiC* gene and are thus not detected in this analysis due to the previously described filtering  
215 criteria. However, all Cyanobacteria having homologs to *kaiB* and *kaiC* are coding for at least one pair of  
216 proteins most similar to KaiB1 and KaiC1 from *Synechocystis* 6803 (Fig. 1B, C), which is consistent with  
217 previous studies [53, 55]. Only *Cyanothece* sp. PCC 7822 has homologs similar to all three *kaiB* and *kaiC*  
218 copies from *Synechocystis* 6803 (Fig. 1C). The majority (67.68%) of the bacterial genera, outside of the  
219 cyanobacterial phylum, encode KaiC3-like proteins. Approximately half of them also contain additional  
220 KaiC homologs, most similar to KaiC1, KaiC2, or sometimes even both (Fig. 1B). This observation  
221 does not hold true for KaiB homologs, here KaiB2 is the major KaiB homolog (75.86%). One group of  
222 organisms, all belonging to the phylum of *Bacteroidetes*, stands out in this analysis, because they encode  
223 only proteins similar to KaiB2/KaiC2 (Fig. 1B). Archaeal genera show mainly homologs with highest  
224 identity to KaiC1 or KaiC3. Furthermore, almost all of the Archaea have multiple copies of the KaiC  
225 protein. Whereas only four have homologs to KaiB, which is either similar to KaiB2 or in thermophilic  
226 *Methanothermobacter* similar to KaiB1 (Fig. 1B).

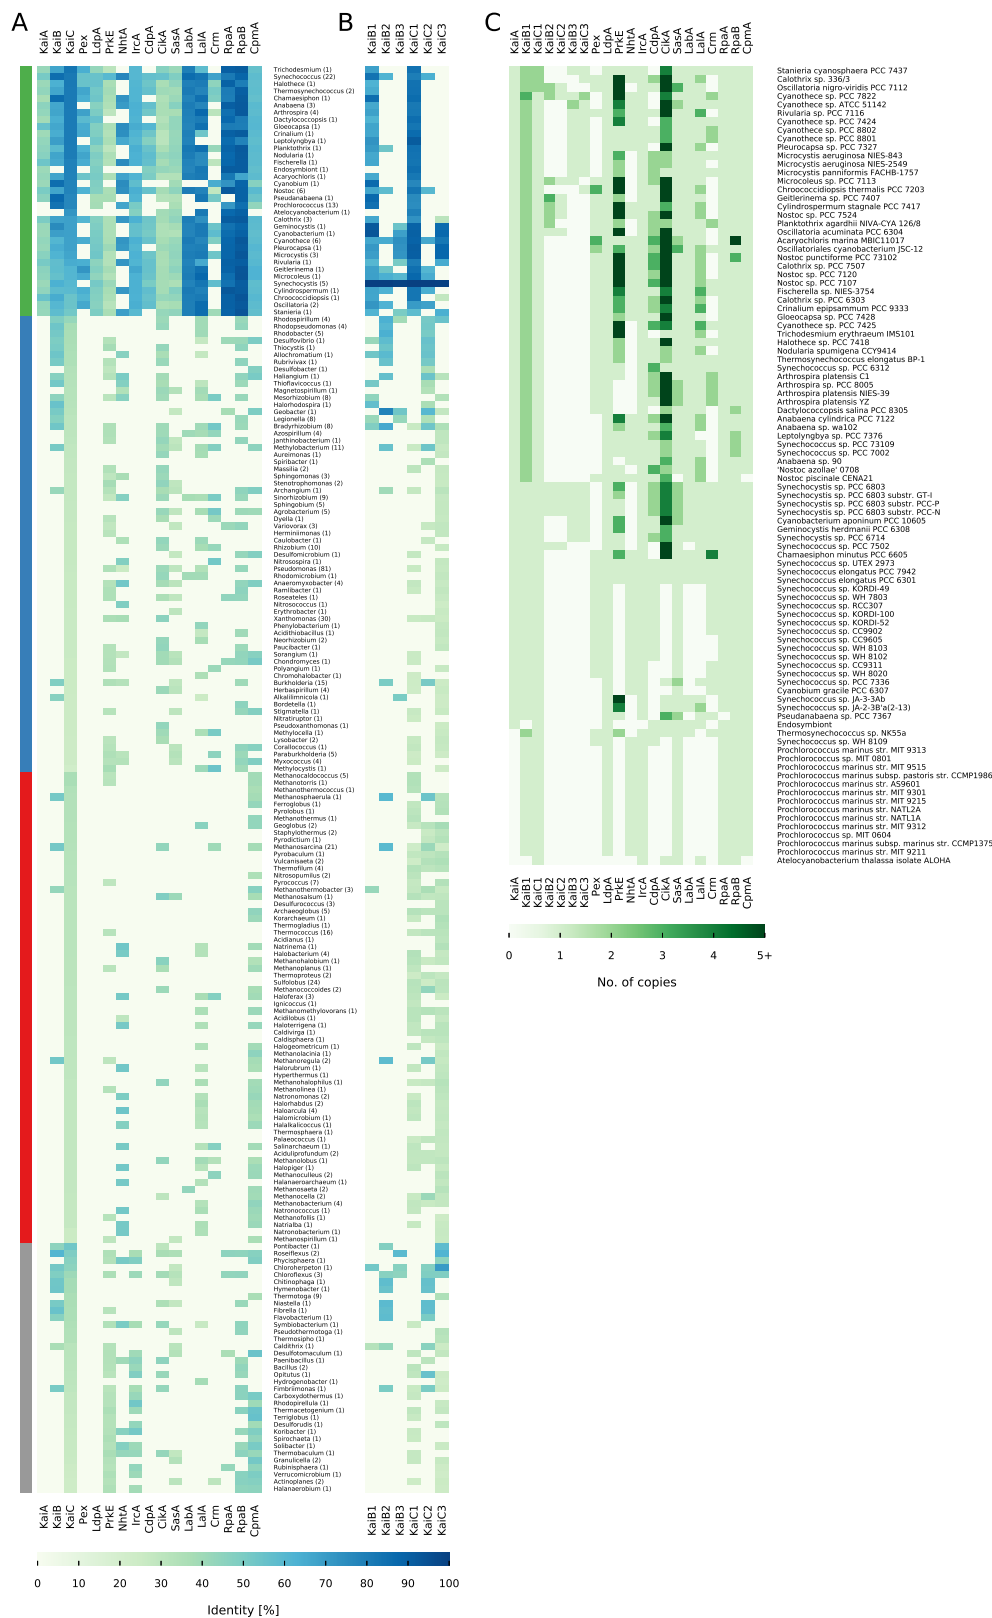

Figure 1: **Distribution of circadian clock proteins.** (A,B) Shown are the mean sequence similarities of each protein for each genus that contains a KaiC homolog from *Synechococcus* 7942. The genera are sorted by their group and KaiC similarity. The number in parenthesis represents the number of individual genomes per genus. (A) shows the mean similarities for the circadian clock proteins of *Synechococcus* 7942. (B) shows the mean similarities for the circadian clock proteins of *Synechocystis* 6803. The four taxonomic main groups are highlighted: Cyanobacteria (Green), Proteobacteria (Blue), Archaea (Red), Other (Grey). (C) shows the number of homologs for each protein in each cyanobacterium. Copy numbers higher than five were condensed.

## 227 **Circadian clock factors involved in solely cyanobacterial input pathways**

228 Multiple clock input factors are present in all four taxonomic groups namely PrkE, NhtA, and CikA. The  
229 latter also acts in the output of the circadian clock (Table S2, Fig. 1A) [36, 37, 44]. The prevalence of  
230 CikA is in good agreement with its tremendous effect on resetting the circadian clock in *Synechococcus*  
231 7942 [37], where its interaction with the Kai complex is mediated by additional proteins [36, 38]. CikA  
232 destabilizes in the presence of oxidized quinones and thereby integrates information about the cellular  
233 redox state into the oscillator [36]. Naturally, CikA-lacking *Prochlorococcus* are not able to reset their  
234 timing mechanism in continuous light [87], pointing at the importance of this factor. However, single  
235 mutations in *sasA* can restore circadian properties in *Synechococcus* 7942 *cikA* mutants and it has been  
236 suggested that a simpler network with modified interactions of the other clock proteins can exist [88].  
237 The input factors Pex, LdpA, and CdpA are found to be unique for cyanobacteria (Fig. 1A), confirming  
238 a previous analysis of *ldpA* [89]. Hence, with Pex, a transcriptional repressor of *kaiA* [34], and LdpA, a  
239 redox-sensing protein [20] two factors, which sense the cellular metabolic state of the circadian clock in  
240 *Synechococcus* 7942, are missing outside of the cyanobacterial phylum. LdpA is also the only input factor  
241 present in the reduced but functional timing system of *Prochlorococcus* [54, 83]. This might indicate the  
242 necessity of this factor for the entrainment of the clock [60]. Nevertheless the possibility of a functional  
243 clock without Pex and LdpA remains, since LdpA and Pex mutants in *Synechococcus* 7942 are only  
244 altered in their period length [90, 35] and Pex is also missing in the KaiA-lacking *Prochlorococcus* and the  
245 KaiA-containing *Synechocystis* 6803 (Fig. 1A). In *Synechococcus* 7942 the third unique cyanobacterial  
246 input factor, CdpA, influences phase resetting and acts in parallel to CikA [38]. Since CdpA seems to be  
247 essential in *Synechococcus* 7942 [38], it likely has a prior role in processes other than phase resetting and  
248 is hence dispensable for input pathways in other organisms than Cyanobacteria.  
249 Altogether, the absence of three important input factors outside of the cyanobacterial phylum suggests  
250 that other entrainment systems might be used for putative timing systems. In *Rhodobacter sphaeroides*,  
251 which displays circadian gene expression rhythms, a histidine kinase is encoded in an operon with *kaiBC*  
252 and was suggested as a candidate for transducing the redox signal to KaiBC [91]. Further, the direct  
253 entrainment by the ATP/ADP ratio [30, 92] might be the primary mechanism to synchronize the circadian  
254 clock with metabolism and the environment.

## 255 **Central output factors are missing in Archaea and non-cyanobacterial genera**

256 The output pathway of the circadian clock in *Synechococcus* 7942 involves eight proteins (see Conclusion).  
257 RpaA serves as a key regulator [43]. Its activity is indirectly modulated depending on the phosphorylation  
258 state and the ATPase activity of KaiC [44, 93]. SasA (antagonistically to CikA) connects the core clock to  
259 RpaA, which in turn regulates global gene expression, including the *kaiBC* promoter [41, 43, 44, 94].  
260 LabA, CrmA and RpaB are also known to affect RpaA [42, 46, 47, 50, 94]. CpmA modulates *kaiA*  
261 expression by an unknown mechanism [49]. In contrast to the unique cyanobacterial input factors, we  
262 found none of the eight output proteins exclusively in Cyanobacteria. Homologs of five factors (SasA,  
263 CikA, LalA, Crm, CpmA) are present in all four investigated taxonomic groups (Table S2). CpmA is  
264 a member of a superfamily essential for purine biosynthesis and thus likely to have orthologs in other  
265 organisms [49]. However, RpaA and RpaB are not present in Archaea and SasA is only found in the  
266 methanogenic genera *Methanospirillum*, and *Methanosalsum*. Hence, the entire central output pathway is  
267 missing in Archaea (Fig. 1A). In addition, orthologs for RpaA are found in only nine non-cyanobacterial  
268 genera, questioning whether another transcription factor might read out the putative core timer in other  
269 Bacteria (Fig. 1A). A previous BLAST search by Dvornyk and colleagues revealed that SasA homologs in  
270 non-cyanobacterial prokaryotes lack the KaiB-like domain [61]. This finding is confirmed in our analysis,  
271 indicating that stimulations of SasA homologs by KaiC outside of Cyanobacteria are very unlikely, because  
272 interaction occurs via this KaiB-like domain, which adopts a thioredoxin-like fold [39, 95]. Altogether,  
273 our analysis reveals that possible circadian clocks of Bacteria and Archaea must use an output pathway  
274 that is different from the one described in *Synechococcus* 7942.

## 275 **Co-occurrence analysis hints at the core module for circadian timing**

276 The previous analysis revealed substantial differences in the composition of the clock components between  
277 Cyanobacteria, other Bacteria, and Archaea. Even within Cyanobacteria there is a huge variety in the  
278 composition of the potential circadian clocks (Fig. 1C). Cyanobacteria have either a severely reduced  
279 timing systems, such as the one in *Prochlorococcus*, a standard system as seen in *Synechococcus* 7942, or  
280 an inflated system as found in *Synechocystis* 6803 (Fig. 1C). This trichotomy of systems raises questions  
281 about essentiality and pairwise co-occurrence of circadian clock proteins. These questions were answered  
282 in a series of right-sided Fisher's exact tests. To avoid systematic biases due to an overrepresentation



283 of closely related strains [96], we extracted 69 unique combinations of the 21 circadian clock factors as  
284 described in materials and methods.

285 Within these 69 unique systems two factors are always present: (i) KaiC, because we selected for organisms  
286 containing at least one KaiC-like protein and (ii) RpaB, which is associated with cell size and circadian  
287 gene expression [42, 51]. RpaB competes for promoter binding sites with RpaA and its phosphorylated  
288 state is thought to inhibit the phosphorylation of RpaA [47]. Other factors present in the majority  
289 ( $\geq 90\%$ ) of the observed unique clock systems are KaiA, KaiB, LdpA, IrcA, CikA, SasA, RpaA and  
290 CpmA. Because of their abundance, most of these factors show no pairwise co-occurrence. For example  
291 RpaA and RpaB are found in 68 and all 69 clock systems, respectively. Thus their joint presence  
292 comes to no surprise. Instead, the finding confirms essential roles in global transcription regulation of  
293 Cyanobacteria [97]. With Fisher's exact test we seek to identify gene pairs rather unexpectedly co-  
294 occurring in a smaller subset of organisms. Such findings can indicate a common function in the circadian  
295 clock system. Only KaiA and CikA, out of the most abundant factors, show significant co-occurrence with  
296 other factors. In addition, Pex, PrkE, CdpA, LabA, LalA, as well as KaiB2 and KaiC2, and KaiB3 and  
297 KaiC3, co-occur significantly (Fig. 2A). Interestingly, all of these factors are missing in *Prochlorococcus*.  
298 Additionally, PrkE, CikA, LabA, and LalA are also missing in most marine *Synechococcus* species.

299 We detected three significant co-occurrences between factors of the input pathway (Fig. 2): (i) between  
300 CikA and its interaction partner PrkE [38] (ii) between PrkE and CdpA and (iii) between the *kaiA*  
301 repressor Pex and CdpA. The first two results are in good agreement with a previous study [38]. Within  
302 the output pathway, there is a significant co-occurrence between LabA and its ortholog LalA. Interestingly,  
303 we identified several significant co-occurrences between factors of the input and the output pathway.  
304 CikA, which functions in the input and output of the clock, co-occurs significantly with LabA, and LalA  
305 (Fig. 2). This fits well in the overall picture as CikA and LabA are thought to regulate the activity of  
306 RpaA [44, 50]. Additionally, PrkE shows also significant occurrences with both LabA and LalA (Fig. 2).  
307 Furthermore, CdpA was found to co-occur significantly with LabA. (Fig. 2) This is of special interest since  
308 PrkE and CdpA are only known as interaction partners of CikA, and both are involved in phase resetting,  
309 and cell division, respectively [38]. This result, however, hints at potential increased involvement of PrkE  
310 and CdpA in the RpaA regulation and supports the view of an integrated network with overlapping  
311 interactions of input and output factors [98]. Notably, no co-occurrence of NhtA and LdpA was detected,  
312 although it was suggested that NhtA might be involved in assembly of the iron-sulfur cofactor of LdpA  
313 [38]. Significant co-occurrences with core factors could only be observed between KaiA and LalA (Fig. 2).  
314 However, KaiA shows a strong, but not significant, co-occurrence with CikA ( $p = 0.0105$ ). Lastly, we  
315 also found significant co-occurrences between KaiB2 and KaiC2 as well as KaiB3 and KaiC3 (Fig. 2).  
316 This indicates two distinct function of the two pairs. In this context it is worth mentioning that *kaiB2*-  
317 containing archaeal genomes always encode a KaiC2 homolog.

318 In summary, we identified a conserved set of factors (Fig. 2), both in input and output that show  
319 significant co-occurrences. This set, composed of KaiA, PrkE, CdpA, CikA, LabA, and LalA, is found in  
320 Cyanobacteria with a true circadian clock such as *Synechococcus* 7942 and *Synechocystis* 6803 [73] but is  
321 missing in cyanobacterial strains with reduced timing mechanisms such as *Prochlorococcus*. This finding  
322 hints at the importance of these factors for the functionality of a circadian clock. On the other hand,  
323 NhtA and Crm seem to play only a minor or extending role in clock regulation, because they are neither  
324 always present nor show significant co-occurrence with other factors.

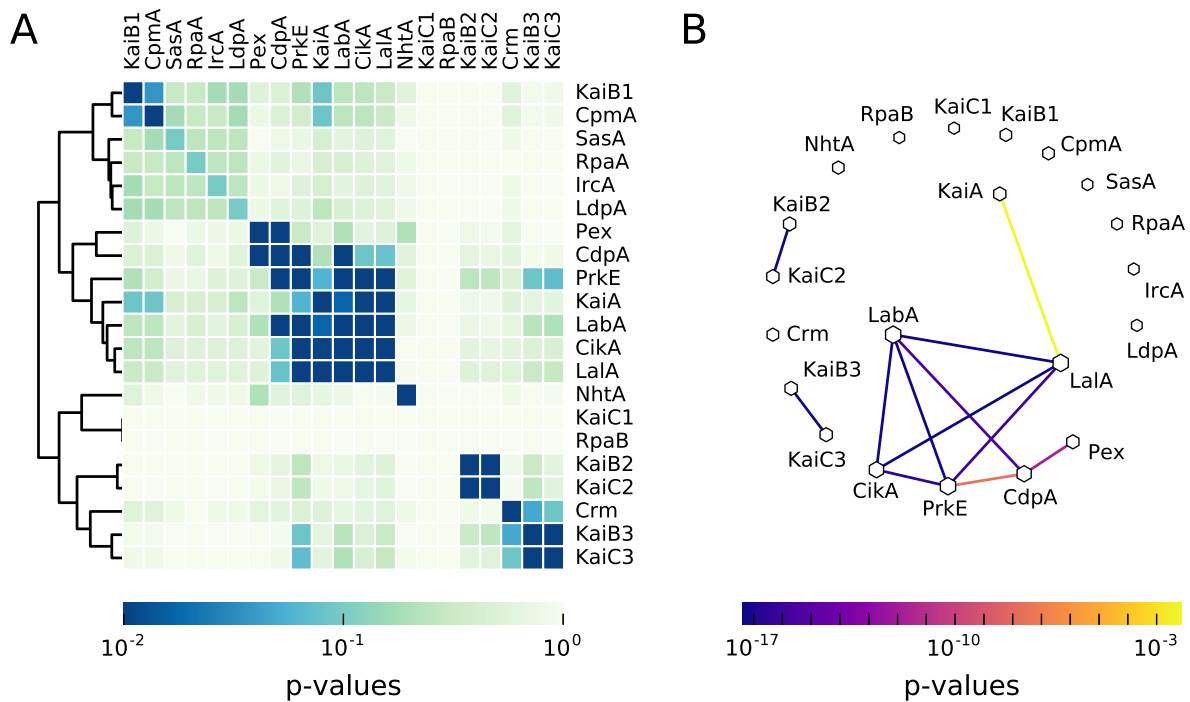

Figure 2: **Co-occurrence of circadian clock proteins in cyanobacteria.** (A) The p-values, calculated by pair-wise Fisher's exact tests, are visualized in a heatmap. Only p-values  $\leq 0.01$  are considered as significant. Proteins are sorted by a hierarchical agglomerative clustering algorithm. (B) Network of significant co-occurring circadian clock factors in cyanobacteria, calculated in regard to the results of the pair-wise Fisher's exact test. The line color corresponds to the level of significance. Missing links are those that had a higher p-value than 0.01. Node size is proportional to the degree of that node.

### 325 A systematic analysis of circadian expression in Cyanobacteria

326 Genome-wide time-resolved expression measurements in a range of cyanobacterial strains have repeatedly  
 327 indicated substantial fractions of genes with circadian regulation patterns [99, 100, 101]. Considering that  
 328 all Cyanobacteria share the challenge of a photoautotrophic lifestyle, which requires major changes in  
 329 the metabolism between day and night, one might expect a common transcriptional regulatory pattern.  
 330 Thus, we compared a total of nine published microarray time-series datasets of different cyanobacterial  
 331 strains under constant light or diurnal light conditions (for details see Table S3, Supplement), which  
 332 were available and applicable for this analysis. Not all of the chosen microarray experiments were con-  
 333 ducted under constant light conditions, which leads to a combination of circadian-clock regulated and  
 334 light-induced genes. We therefore refer to genes with oscillating expression as diurnally regulated instead  
 335 of circadian. For allowing a direct comparison, we reprocessed the raw-data and subjected the resulting  
 336 expression time series to a harmonic regression oscillation detection. This method assumes a sinusoidal  
 337 shape of circadian expression profiles and uses linear expression profiles as background, yielding estimates  
 338 of the peak phase and amplitude of each gene.

339 In a first step we compare biological replicate datasets to establish the reproducibility of strain-specific  
 340 circadian expression programs. Similarity between two circadian expression programs was established  
 341 using the circular correlation coefficient  $\rho_{ccc}$  as described by Jammalamadaka and Sarma [102] applied  
 342 to estimated peak expression phases. The following analyses were limited to genes with oscillating ex-  
 343 pression profiles in both compared datasets since only in these cases phase and amplitude estimates are  
 344 meaningful descriptors. Direct comparison of the oscillation phases and amplitudes indicates good repro-  
 345 ducibility between two respective measurements in form of statistically significant elevated correlation  
 346 of the circadian expression patterns in *Synechococcus* 7942 ( $\rho_{ccc} = 0.61$ ,  $p \ll 0.01$ ), *Synechocystis* 6803  
 347 ( $\rho_{ccc} = 0.31$ ,  $p \ll 0.01$ ), and *Cyanothece* sp. ATCC 51142 ( $\rho_{ccc} = -0.51$ ,  $p \ll 0.01$ ) (Figure 4 top row).  
 348 While the *Synechocystis* 6803 datasets show significant similarity, the correlation is diminished by the  
 349 distinct concentration of expression phases during the day in the beck14 dataset compared to the leh13  
 350 measurements. Interestingly, both *Cyanothece* sp. ATCC 51142 datasets exhibit a good agreement of  
 351 peak expression phases with large early day and early night clusters, but the large negative correlation

352 emphasizes the presence of a significant number of anti-phasic gene pairs. The corresponding oscillation  
353 amplitude values exhibit high statistically significant correlations ( $\rho_{ccc} > 0.77$ ) for all three datasets  
354 (Fig. 3 bottom row).

355 This observation motivated the second step of the analysis, the comparison of expression patterns between  
356 different cyanobacterial strains. To facilitate this comparison, the prediction of homologous genes in the  
357 cyanobacterial clade by Beck and colleagues [103] was used as starting point. We focused first on the set of  
358 genes with oscillating expression patterns in all datasets. The estimate of the core diurnal genome based  
359 on the presented data collection spans 95 genes (Table S5), which are mostly involved in central metabolic  
360 processes. Most strikingly, 18 out of 64 genes annotated by Cyanobase [68] as “ribosomal protein” genes  
361 in *Synechocystis* 6803 fall into the core diurnal set, furthermore seven out of 27 genes annotated with  
362 ”photosystem II”. The remaining diurnally expressed genes are found interspersed across the metabolic  
363 network. While genes coding for parts of photosystem, the RNA polymerase, or the ribosomal proteins  
364 can be expected to serve important roles in the adaptation to photic and aphotic phases, this analysis  
365 ascribes similar importance to other metabolic processes e.g. in the repair of UV-damaged Photosystem  
366 II centers (*slr1390*) [104], in the phosphate transport system (*pstB2*), pyrimidine and arginine biosyn-  
367 thesis (*sll1498*), or the glycolysis/gluconeogenesis via the fructose-bisphosphate aldolase (*sll0018*). By  
368 excluding genes, which possess light-inducible expression, marker gene candidates for a working clock can  
369 be derived from the core diurnal genome, such as the light-independent protochlorophyllide reductase  
370 subunit ChlB and the fructose-bisphosphate aldolase *fbp*. Indeed, *fbp* also shows circadian expression  
371 patterns in *Clamydomonas reinhardtii* [105] and *Arabidopsis thaliana* where its late-night peaks may re-  
372 flect the great importance of these aldolases in higher plants for the mobilization of plastidic starch [106].  
373 Particularly in higher plants, the mobilization of starch, the conversion into sucrose, and its transport to  
374 other parts of the plant occur mainly at night.

375 The group of 15 ”hypothetical protein” genes in the core diurnal genome constitutes an excellent candi-  
376 date set for novel clock-driven genes in strains with a working core clock. Interestingly, several of  
377 these genes are implicated with cell division, such as the YlmG-related hypothetical gene *ssl0353*, which  
378 is required for proper distribution of nucleoids in cyanobacteria and chloroplasts [107]. Similarly, the  
379 hypothetical protein *slr1577* is suggested to function in the separation of chromosomes during cell divi-  
380 sion (Uniprot entry P74610). For the gene *slr1847* (Uniprot entry P73057) a DNA binding capability is  
381 suggested, which could therefore regulate expression, aid nucleoid organization, or protect the DNA.

382 The core clock genes *kaiA*, *kaiB*, and *kaiC* are a good starting point for a detailed comparative expression  
383 analysis. Only the *kaiB1* is significantly oscillating in all considered datasets. Interestingly, the *kaiA* gene  
384 features only very low amplitude expression oscillations and is arrhythmic in the vijayan09 *Synechococcus*  
385 7942 dataset. The expression phases vary from dawn (*Microcystis aeruginosa* PCC 7806) to morning  
386 (*Synechocystis* 6803), over midday (stoeckel08 dataset of *Cyanothece* sp. ATCC 51142), and dusk (ito09  
387 dataset of *Synechococcus* 7942), into night (*Anabaena* sp. PCC 7120). The observed expression phases  
388 of *kaiB1* are comparable to those of *kaiA*, but with significantly larger amplitude in *Synechococcus* 7942  
389 datasets. The phase of the *kaiB1* homolog in *Prochlorococcus marinus* MED4 peaks before dawn, compar-  
390 able to *Anabaena* sp. PCC 7120. The *kaiC1* expression phases and amplitudes match those of *kaiB1*,  
391 with the notable exception of *Cyanothece* sp. ATCC 51142 for which antiphasic late-night peaks are  
392 observed. In *Prochlorococcus marinus* MED4, *kaiC1* peaks during the early night in contrast to the late  
393 night phase of *kaiB1*.

394 Many aspects agree well with previous knowledge. In *Synechococcus* 7942, the core clock genes *kaiB*  
395 and *kaiC* are arranged in the *kaiBC* operon resulting in similar expression patterns [108, 109, 110],  
396 while *Cyanothece* sp. ATCC 51142 features the *kaiAB1C1* operon [111]. Interestingly, *Cyanothece* sp.  
397 ATCC 51142 features consistent anti-phasic expression of *kaiB1* and *kaiC1* whereas the remaining strains  
398 show co-expression, hinting at *Cyanothece*-specific post-transcriptional regulation of *kaiB1* or *kaiC1*. Os-  
399 cillations in the *kaiA* gene expression, as reported by Ishiura and colleagues, feature small expression  
400 amplitudes compared to *kaiB* and *kaiC* [112]. In fact, *kaiA* consistently falls below the threshold of  
401 2-fold expression change for the classification as circadian oscillator, which is commonly employed in  
402 microarray studies.

403 In the second step we generalized the detailed analysis of expression phases as presented for the core  
404 diurnal genome. We applied the circular correlation measure to all possible combinations of expres-  
405 sion datasets. The resulting distribution reveals a clear separation between pairs of biological replicate  
406 datasets, featuring large numbers of shared oscillating genes and more extreme correlations (Fig. 4 red),  
407 and pairs of different cyanobacterial strains with fewer shared oscillating genes and much less extreme  
408 correlation coefficients (Fig. 4 blue). The only exception to this separation is the *Cyanothece* sp. ATCC  
409 51142 dataset stoeckel08 (Fig. 4 green), which shares many oscillating genes with both *Synechocystis*  
410 6803 datasets (leh13, beck14). The corresponding correlation coefficients are, however, similarly small  
411 compared to other inter-strain pairs. The full set of pairwise phase comparisons, which underlay this

412 analysis are shown in Figure S1. This result indicates that the diurnal peak expression phase is not  
 413 preserved amongst homologous genes in the cyanobacterial clade but might instead be tuned according  
 414 to the metabolic gene outfit and the environmental needs of the respective strain.

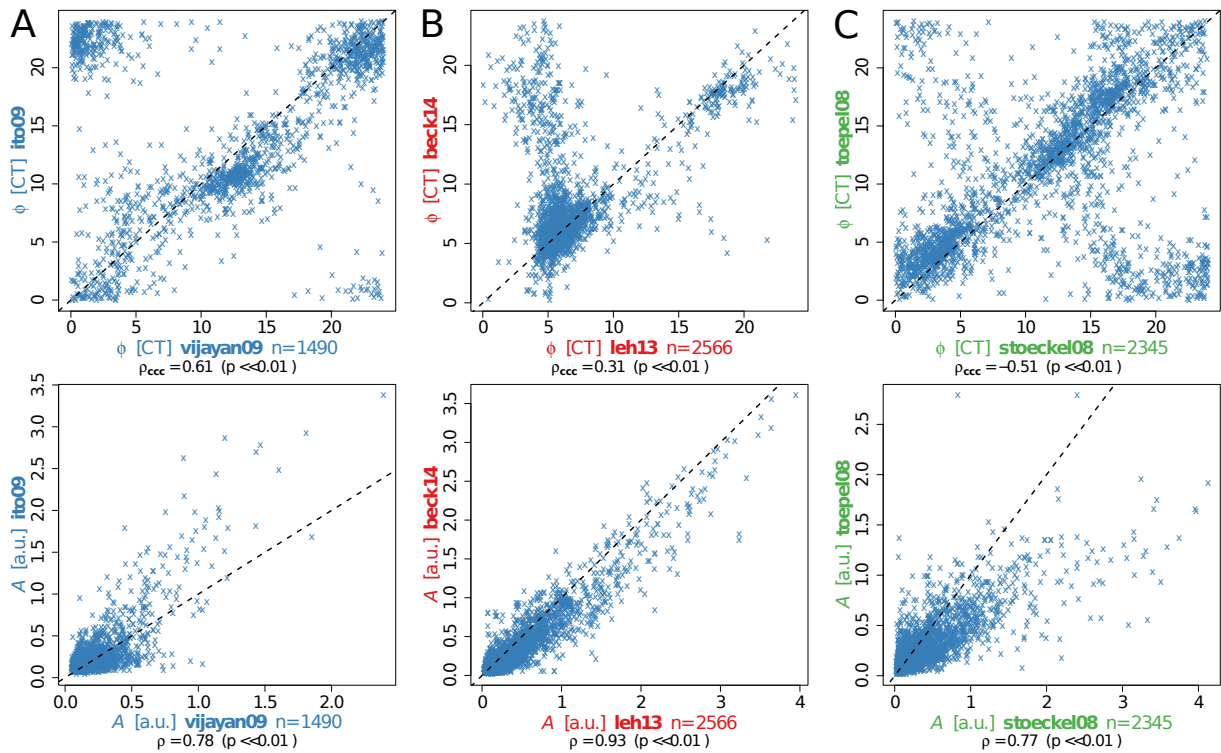

**Figure 3: Phase and amplitude reproducibility of diurnal genes within cyanobacterial strains.** Comparison of expression phase  $\phi$  (top, [CT]) and amplitude  $A$  (bottom, [a.u.]) of diurnal genes shared between independent datasets of the same cyanobacterial strain. (A) *Synechococcus* datasets of Vijayan and colleagues [113] (x-axis) and Ito and coworkers [101] (y-axis), (B) *Synechocystis* in the datasets of Lehmann and coworkers [76] (x-axis) and Beck and colleagues [103] (y-axis), and (C) *Cyanotheca* in Stöckel and colleagues [114] (x-axis) and Toepel and colleagues [115] (y-axis). The number of genes  $n$  found to oscillate significantly and the corresponding Pearson correlation coefficient  $\rho$  between  $\phi$  and  $A$  is provided below each panel, followed by the respective p-value for  $\rho$  differing from 0. For  $\phi$ , the circular correlation coefficient  $\rho_{ccc}$  is also provided. Axis labels are shown in the strain-specific color.



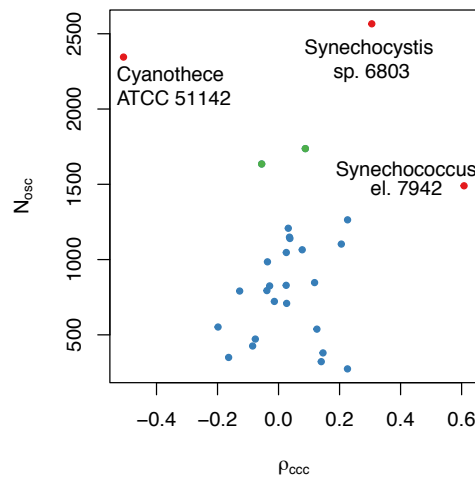

Figure 4: **Expression phase similarity versus number of shared oscillating genes.** The comparison is carried out between all dataset combinations. Biological replicate experiments available for three cyanobacterial strains show a large number of shared oscillating genes as well as large correlation coefficients (red). The comparison of the stoeckel08 dataset (*Cyanothece*) with both *Synechocystis* datasets is marked in green. The remaining comparisons between various strains are shown in blue.

#### 415 Core circadian clock proteins, KaiA, KaiB, KaiC, vary in number and length

416 The previously observed diversity of circadian clocks within Cyanobacteria, and between other Bacteria  
417 and Archaea prompted further sequence analyses of the core clock proteins KaiA, KaiB and KaiC. Length  
418 comparisons gave rise to some new features of variations between the core factors of the circadian clock  
419 (Fig. 5). As described in the preceding, our BLAST analysis detected KaiA exclusively in Cyanobacteria.  
420 Interestingly, we could distinguish three subtypes of KaiA. While the sequence length of most KaiA  
421 is around 300 amino acids (AA) (*Synechococcus* 7942: 284 AA) some stains have shortend homologs  
422 with a length of roughly 200 and 100 AA, respectively (Fig. 5A, C). Truncated KaiA proteins are almost  
423 exclusively found in members of the order *Nostocales*. Similar results were reported previously by Dvornyk  
424 and colleagues, who also observed a higher degree of polymorphism for the *kaiA* gene in comparison to  
425 *kaiB* and *kaiC* [52, 53]. Multiple alignments of the KaiA proteins (Fig. S2) verified that the truncated  
426 KaiA proteins have a shortened N-terminal sequence, which functions in the complete protein as the  
427 amplitude amplifier [116]. However, all of these KaiA orthologs contain the C-terminal part important  
428 for clock oscillation [116].

429 Distribution of the KaiB protein length reveals two distinct groups. The KaiB homologs are either as  
430 long as the one from *Synechococcus* 7942 (102 AA) or about 250 AA in length (Fig. 5B, C). *Microcoleus*  
431 sp. PCC 7113 even has a KaiB with the length of 381 AA. KaiB homologs with query length are  
432 present in all four groups (Fig. 5B). Elongated KaiB proteins are mainly present in Cyanobacteria in the  
433 subclass *Oscillatoriothycideae* and the order *Nostocales*, specifying findings of Dvornyk [53] (Fig. 5C).  
434 BLAST analyses using the KaiB homologs from *Synechocystis* 6803 revealed that elongated variants are  
435 most similar to KaiB1. Elongation via concatenation of two KaiB was ruled out by visually inspecting  
436 alignments with two artificially concatenated KaiB1. Instead the elongated KaiB1 have a ~150 AA N-  
437 terminal extension. BLAST searches of the N-terminal region showed no homologous sequences in other  
438 organisms than Cyanobacteria, and no putative conserved domains could be identified. However, the  
439 N-terminal part is highly conserved within the Cyanobacteria having this KaiB variant. Interestingly,  
440 those *Nostocales* with an elongated KaiB1, also show a truncated KaiA.

441 The KaiC protein from *Synechococcus* 7942 is 519 AA in length and is build up by two domains, the CI and  
442 CII domain, which have a high similarity and are connected by a linker-domain [117, 118]. The C-terminal  
443 CII domain of KaiC comprises the interaction sites with KaiA as well as the specific phosphorylation  
444 sites [29, 119, 120, 121]. KaiC homologs were detected with lengths varying between 101 AA and 741  
445 AA (Fig. 5A, B). There are KaiC homologs in Archaea representing the whole observed length spectrum  
446 of KaiC, whereas bacterial KaiCs are almost always about 500 AA in length (Fig. 5A, B). Furthermore,  
447 in Bacteria and Archaea KaiB (and KaiA in Cyanobacteria) is only found when a 'full-length' KaiC is  
448 present. In these bacterial organisms the length of KaiC is almost constant, regardless of the length of  
449 KaiA and KaiB homologs (Fig. 5A, B). However, in KaiB-possessing Archaea additional shorter KaiC  
450 homologs are found (Fig. 5B).

451 Moreover, the length distribution of KaiC revealed a substantial amount of KaiC homologs with a length  
452 of circa 250 AA, which is approximately the length of one KaiC domain. This KaiC variant is mainly  
453 found in Archaea, but also in a few Bacteria. In these bacterial species no KaiB homolog could be  
454 identified. Shorter KaiC homologs do not contain the important phosphorylation sites for maintaining  
455 the oscillator function. Therefore, they might not restore the full functionality of the *Synechococcus* 7942  
456 KaiC, but can rather answer questions about the evolution of KaiC [53]. Regarding the evolution of  
457 KaiC, two valid hypotheses exist, both of which state that KaiC arose from a shorter ancestral *recA*  
458 gene followed by a gene duplication and fusion. However, on the one hand Leipe and colleagues [122]  
459 hypothesize that an ancestral single-domain KaiC originated in Bacteria, was transferred into Archaea,  
460 where its two-domain version originated, and a second lateral transfer event introduced the double domain  
461 KaiC into cyanobacteria. On the other hand Dvornyk and coworkers [53] argue in a follow up study that  
462 KaiC has to be of cyanobacterial origin. Given the amount of new genomic data further studies would  
463 help to unravel the evolutionary history of KaiC.

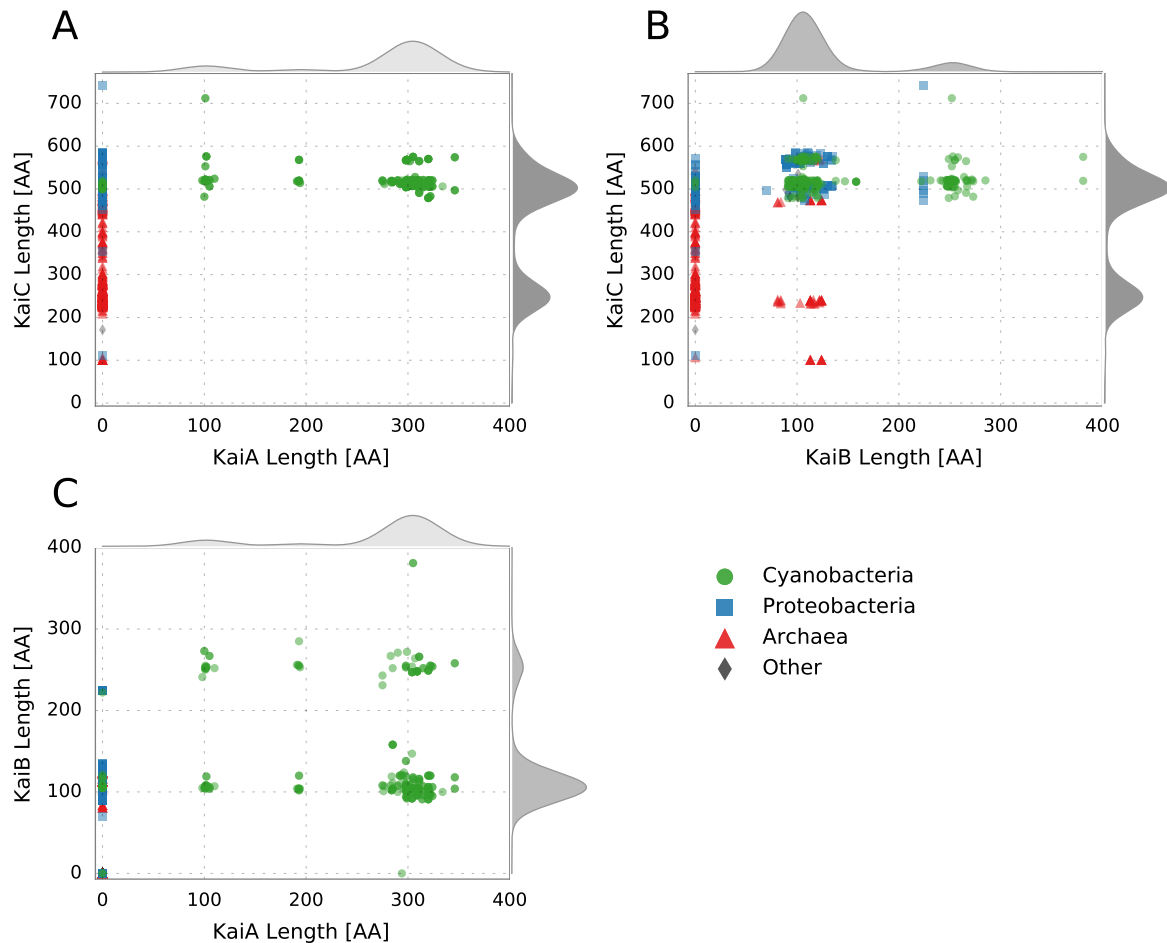

Figure 5: **Protein length distribution of the circadian clock factors from *Synechococcus* 7942 and its homologs.** The four taxonomic main groups are highlighted: Cyanobacteria (Green), Proteobacteria (Blue), Archaea (Red), Other (Grey). The curves outside of the plot represent the cumulative density distribution of the respective protein. (A) KaiC length distribution in dependency of the KaiA length. (B) KaiC length distribution in dependency of the KaiB length. (C) KaiB length distribution in dependency of the KaiA length.

#### 464 Conserved motifs and activities in the cyanobacterial KaiC subgroups

465 For KaiC2 homologs outside of the cyanobacterial phylum an involvement in stress response (*Legionella*  
466 *pneumophila* [123]) and adaptive growth under rhythmic conditions (*Rhodospirillum rubrum* [57])  
467 has been demonstrated. Both proteins display autophosphorylation and KaiC2 from *Rhodospirillum*  
468 *pneumophila* shows elevated ATPase activity [57]. Nevertheless, the function of cyanobacterial KaiC2 and

469 KaiC3 homologs remains unclear. We already demonstrated that KaiC2 and KaiC3 from *Synechocystis*  
470 6803 displays kinase activity, which is independent of KaiA, whereas KaiC1 behaved like its *Synechococcus*  
471 7942 ortholog [55]. Those activities could also be predicted from the C-terminal amino acid sequences  
472 [55]. To test whether general features of the three KaiC subgroups can be predicted, multiple alignments  
473 of the cyanobacterial KaiC1, KaiC2 and KaiC3 sequences were constructed. A WebLogo analysis revealed  
474 that relevant motifs for phosphorylation and dephosphorylation in the CII domain are highly conserved.  
475 The ATP-binding Walker Motif A (P-loop in Fig. 6A, GXXXXGKT, [112, 124, 125]) is present in all three  
476 KaiC subgroups. Strikingly, the respective sequence of KaiC-7942 (GATGTGKT) shows almost no mod-  
477 ifications in KaiC1 and KaiC3 proteins. Furthermore, catalytic glutamates (EE in Fig. 6A, [126, 127]),  
478 the R-finger contacting the  $\gamma$ -phosphate of ATP [128], and the truncated Walker motif B (WalkerB in  
479 Fig. 6A, [26, 112, 125]), were found in all cyanobacterial KaiC subgroups. Notably, the arginine residue  
480 of the *Synechococcus* 7942 Walker B motif is not conserved in KaiC2 homologs. Serine and subsequent  
481 threonine are the dominant phosphorylation sites in KaiC1 and KaiC3 proteins, like S431 and T432 in  
482 KaiC-7942 [119, 120], whereas KaiC2 homologs display two serine residues. In some KaiC3 homologs  
483 a tyrosin is present as second phosphorylation site. T426, which is important for dephosphorylation of  
484 KaiC-7942 [119, 126, 129, 130], is also highly conserved. Therefore, phosphorylation and dephosphoryla-  
485 tion via autokinase [26], ATP synthase and ATPase activity [27, 126], respectively, are very likely for all  
486 cyanobacterial KaiC homologs. The same holds true for the N-terminal ATPase activity: We observed  
487 high conservation of the Walker motif A (P-loop in Fig. 6A), the catalytic glutamate residues (EE in  
488 Fig. 6A) and the R-finger in the CI domains of all cyanobacterial KaiC subgroups. The presence of the  
489 R-linker in CI domains of KaiC1 and KaiC3 homologs indicate a structural coupling of the N-terminal  
490 CI and the C-terminal CII-domain as it was demonstrated for *Thermosynechococcus* KaiC [128], whereas  
491 KaiC2 homologs lack the R-linker in CI.

492 KaiC homologs from the genus *Prochlorococcus* were classified as KaiC1 orthologs in our BLAST anal-  
493 ysis (Fig. 1B). However, *Prochlorococcus* strains do not contain KaiA, and KaiC from *Prochlorococcus*  
494 *marinus* MED4 was demonstrated to phosphorylate independently of KaiA due to a modified A-loop  
495 sequence [83]. Therefore, we compared WebLogos of the A-loop sequence [28] for KaiC1 orthologs from  
496 Cyanobacteria with and without KaiA (Fig. 6A). The most obvious difference to KaiC1 proteins from  
497 cyanobacterial strains with KaiA is the presence of neutral glutamine in the second position, instead of  
498 a positively charged arginine. In KaiC2 and KaiC3 Weblogos motifs are even less conserved as already  
499 described for the *Synechocystis* 6803 representatives [55]. Interestingly, the KaiC3 WebLogo motif does  
500 not display any charged residue anymore. The absence of A-loop residues that are important to keep it  
501 in the buried state [28] indicate that the KaiA-independent phosphorylation is characteristic for KaiC2  
502 and KaiC3 homologs. This is supported by the low conservation of the 438-444-loop and/or the 422-  
503 loop, which are part of the interaction network that mediates inhibition of phosphorylation by the buried  
504 A-loops in *Synechococcus* 7942 [28, 118]. The high conservation of these loops in KaiA-lacking strains  
505 remains enigmatic.

506 To test this hypothesis, phosphate uptake as an exemplary KaiC activity was analyzed for representa-  
507 tive cyanobacterial KaiC1 and KaiC3 proteins by incubation with  $\gamma$ -P<sup>32</sup>-ATP at 30 °C in the presence  
508 and absence of *Synechococcus* 7942 KaiA (KaiA-7942) The well-studied KaiC from *Synechococcus* 7942  
509 (KaiC-7942) served as control. As demonstrated in Figure 6B and 6C all recombinant KaiC proteins in-  
510 corporated phosphate over time. The intrinsic kinase activity of KaiC1 homologs from *Nostoc punctiforme*  
511 ATCC 29413 (KaiC1-N294133), *Synechocystis* sp. PCC 6714 (KaiC1-Sy6714), and *Cyanothece* sp. PCC  
512 7424 (KaiC1-Cy7424) was stimulated by KaiA-7942, similar to KaiC-7942 (Fig. 6B). As expected, KaiA  
513 had no effect on autophosphorylation of KaiC3 from *Cyanothece* sp. PCC 7424 (KaiC3-Cy7424) and *Mi-*  
514 *crocyctis aeruginosa* PCC 7806 (KaiC3-Mic7806, Fig. 6C). To extend the analysis to non-cyanobacterial  
515 proteins, KaiC3 from the hyperthermophilic Archaea *Thermococcus litoralis* (KaiC3-T.lit) and *Pyrococ-*  
516 *cus horikoshii* (KaiC3-P.hor), which show optimal growth at 85 °C and 98 °C [131, 132], were analyzed  
517 in a similar way. Again both recombinant KaiC3 proteins displayed phosphorylation at 30 °C, which  
518 was independent of KaiA-7942 (Fig. 6C). Incubation at 75 °C indicated that the two archaeal KaiC3  
519 homologs display kinase activity also at high growth temperatures (Fig. 6D). Hence kinase activity of  
520 KaiC proteins seems to be well-conserved, independent of the growth conditions of the strains, they are  
521 originating from.

A

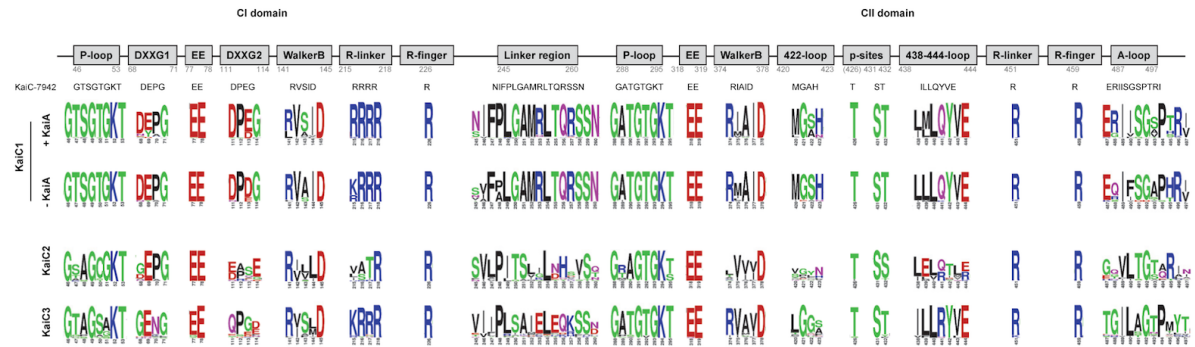

B

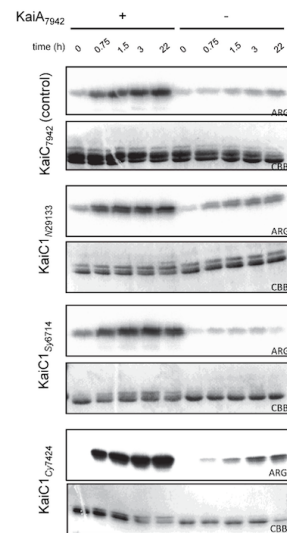

C

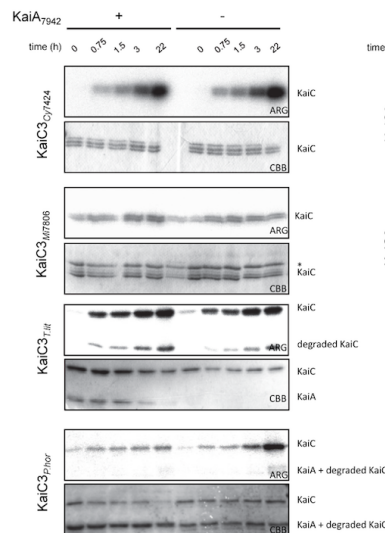

D

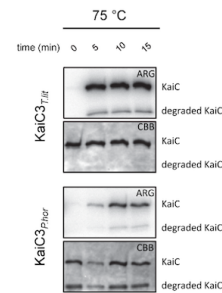

Figure 6: **Activity of diverged KaiC homologs.** (A) Conservation of important motifs in cyanobacterial KaiC1, KaiC2 and KaiC3 homologs based on a WebLogo analyses. Motifs in KaiC1 homologs are displayed for proteins from organisms, which encode a KaiA protein or lack KaiA, respectively. Numbers indicate the residues in KaiC-7942. Properties of the residues are displayed as follows: polar (green), neutral (purple), basic (blue), acidic (red), and hydrophobic (black). (B,C) Phosphate uptake analyses of selected KaiC1 (B) and KaiC3 (C) homologs at 30 °C in dependence of KaiA. KaiC proteins were incubated with or without KaiA-7942 in the presence of  $\gamma$ -P<sup>32</sup>-ATP. After 0, 0.75, 1.5, 3, and 22 hours samples were separated via SDS-PAGE, stained with Coomassie (CBB), and subjected to autoradiography (ARG). The asterisk indicates a contaminating protein. (D) Kinase activity of archaeal KaiC3 homologs at 75 °C. KaiC3 proteins from *Thermococcus litoralis* and *Pyrococcus horikoshii* were incubated with  $\gamma$ -P<sup>32</sup>-ATP and autophosphorylation was analyzed after 0, 5, 10, and 15 minutes. Shown are the Coomassie stained proteins (CBB) and autoradiography (ARG).



## 522 Conclusion

### 523 A core module for circadian regulation

524 Our analysis of 11,264 genomes clearly demonstrates that components of the *Synechococcus* 7942 circadian  
525 clock are present in various bacteria and archaea. However, the frequency of Kai-clock related proteins  
526 is highest in Cyanobacteria. In fact KaiA, Pex, LdpA, and CdpA are exclusive to organisms of this  
527 phylum. In other organisms, e.g *Rhodobacter sphaeroides*, reduced KaiBC-based clock systems are likely  
528 able to drive circadian oscillations [91]. An even simpler system solely dependent on KaiC might enable  
529 diurnal rhythms in *Haloferox volcanii* [59], probably using the ATP/ADP ratio for clock entrainment.  
530 Predictions for KaiC activities based on sequence alignments and motif analyses were validated through  
531 a series of biochemical experiments. We confirmed ATPase and kinase activity for ‘full-length’ KaiC  
532 proteins composed of one CI and one CII domains, even in organism without *kaiA* or *kaiB*. KaiA from  
533 *Synechococcus* 7942 enhanced KaiC-phosphorylation only in strains naturally possessing a *kaiA* gene.

534 Our co-occurrence analysis hints to a conserved extension set for circadian regulation, which is present in  
535 cyanobacteria with observed circadian behavior and absent in cyanobacteria having a diurnal, hourglass-  
536 like lifestyle only (see also Fig. 7). A diurnal core set, which is important to enable an hourglass-like  
537 timing system that resets every day, might be composed of KaiB, KaiC, LdpA, IrcA, SasA, RpaA, RpaB,  
538 and CpmA. However, our identified circadian core set, which potentially enables a self-sustained clock,  
539 consists of KaiA, the two input factors CdpA, and PrkE as well as the input and output factor CikA,  
540 and the output factors LabA, and LalA.

541 The systematic comparison of microarray timeseries datasets indicates that the diurnal peak expression  
542 phase is not conserved amongst homologous genes in the cyanobacterial clade. Instead, the expression  
543 phase may be tuned according to the gene outfit and varying environmental needs. The analysis yielded  
544 a set of 95 genes in the core diurnal genome, which can be considered critical for the adaptation to day  
545 and night. Particularly the subset of non-light induced genes are prime candidates for circadian clock  
546 marker genes. This set furthermore contains several hypothetical genes, which are interesting candidates  
547 for novel clock-driven genes.

548 The gained insights about the diversity within the composition of the components involved in the circadian  
549 protein clock as well as the diversity on the sequence level of the core factors call for further modification  
550 and simplification of the clock. The exponential increase of molecular tools for synthetic applications in  
551 recent years sets the stage for such ambitious projects. A future goal could be the reduction of complexity  
552 by removing as much factors as possible so that an integration of a circadian clock in synthetic and  
553 industrially valuable organisms becomes feasible.

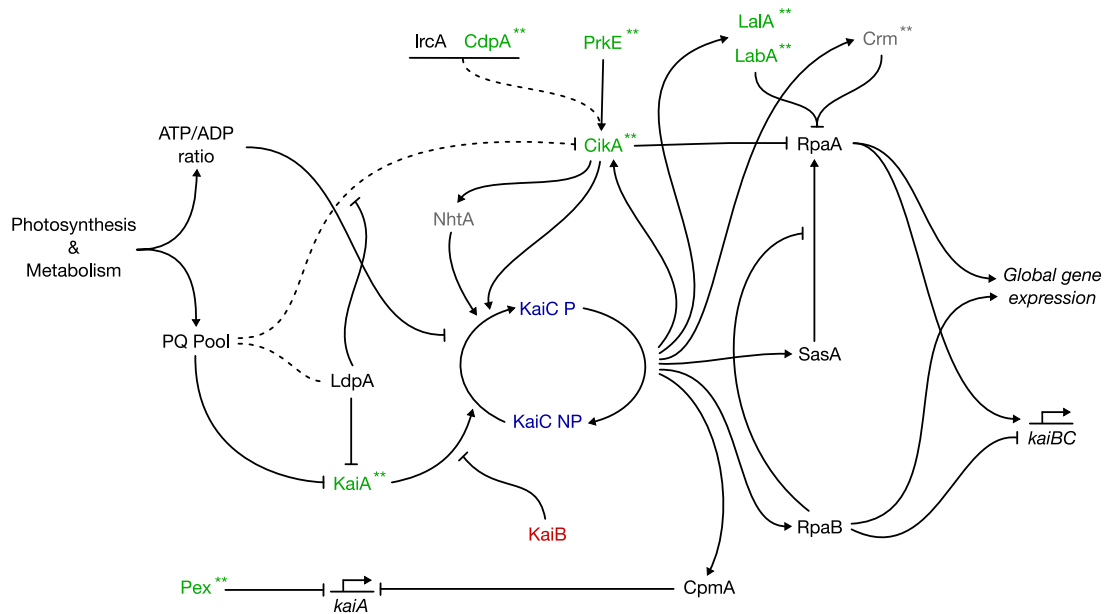

Figure 7: **Schematic overview of the circadian clock in *Synechococcus* 7942.** Shown are the protein interactions based on [20, 34, 35, 36, 37, 38, 39, 40, 41, 42, 43, 44, 45, 46, 47, 48, 49, 50, 51]. The plastoquinone pool and ATP/ADP ratio serve as input signals to entrain the circadian clock with the environment and metabolic state of the cell. The signals are recognized by the input factors LdpA and Cika and the core clock factors KaiA and KaiC. Other input factors are Pex, and the Cika interaction partner NhtA, PrkE, IrcA, and CdpA. The stimulating effect of KaiA on KaiC is antagonized by KaiB. The output of the clock is comprised by SasA, Cika, RpaA, RpaB, LabA, Lala, Crm, and CpmA. SasA interacts with KaiC and further phosphorylates RpaA, whereas Cika acts as a phosphatase on RpaA. RpaA is also regulated by LabA, Crm, and RpaB. RpaA together with RpaB controls global gene expression as well as the expression of the *kaiBC* cluster. CpmA is a transcriptional regulator of *kaiA*. The seven most interconnected factors we found in our co-occurrence analysis are highlighted in green. Factors colored in light grey showed no co-occurrence in the Fisher's exact test and are present in < 90% of all observed systems. Asterisks (\*\*) indicate the factors missing in *Prochlorococcus*.

554 Supplemental Material

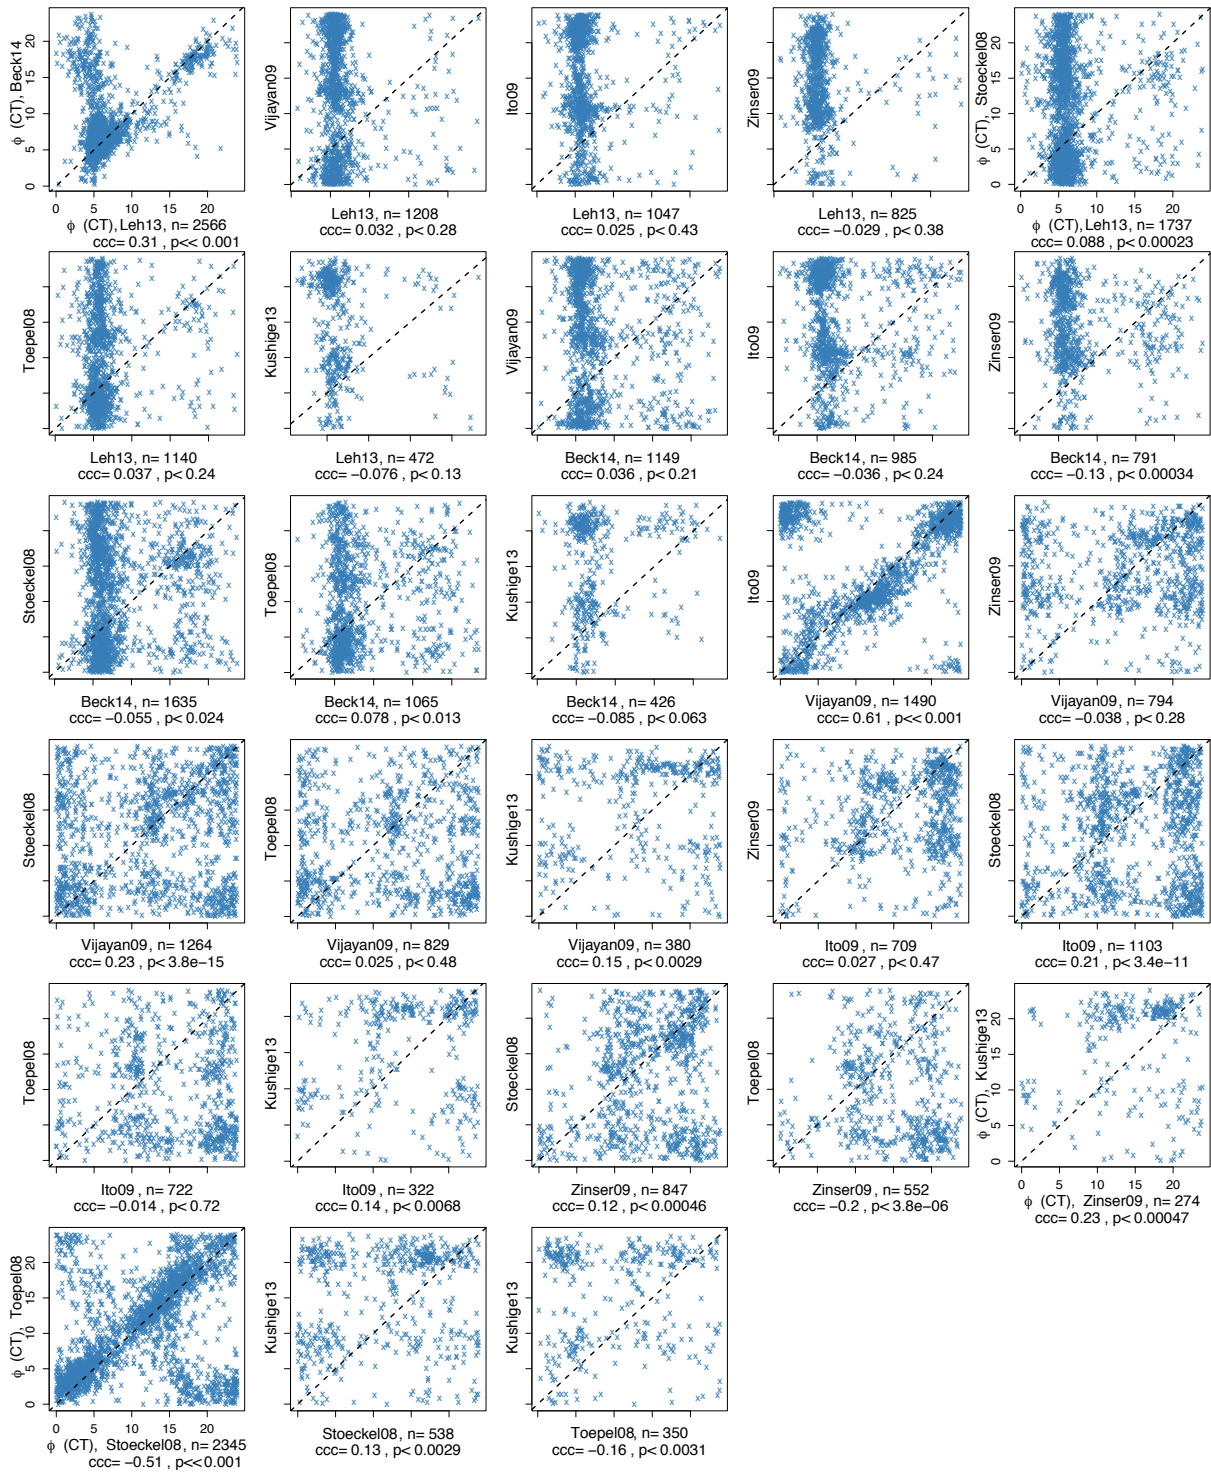

Figure S1: **Expression phase similarity across cyanobacterial strains by pairwise comparison between available datasets.** All possible pairwise combinations of available circadian datasets are compared with respect to peak expression phase, considering only genes, which oscillate significantly ( $\text{fdr} < 0.05$ ) in both datasets. While phases are compared directly for same-strain combinations, gene pairs across different strains are derived via homology prediction. The respective dataset is shown on each axis, the count of homologous genes significantly oscillating is provided with the x-axis label, together with the circular correlation coefficient  $\rho_{ccc}$  and the resulting p-value.

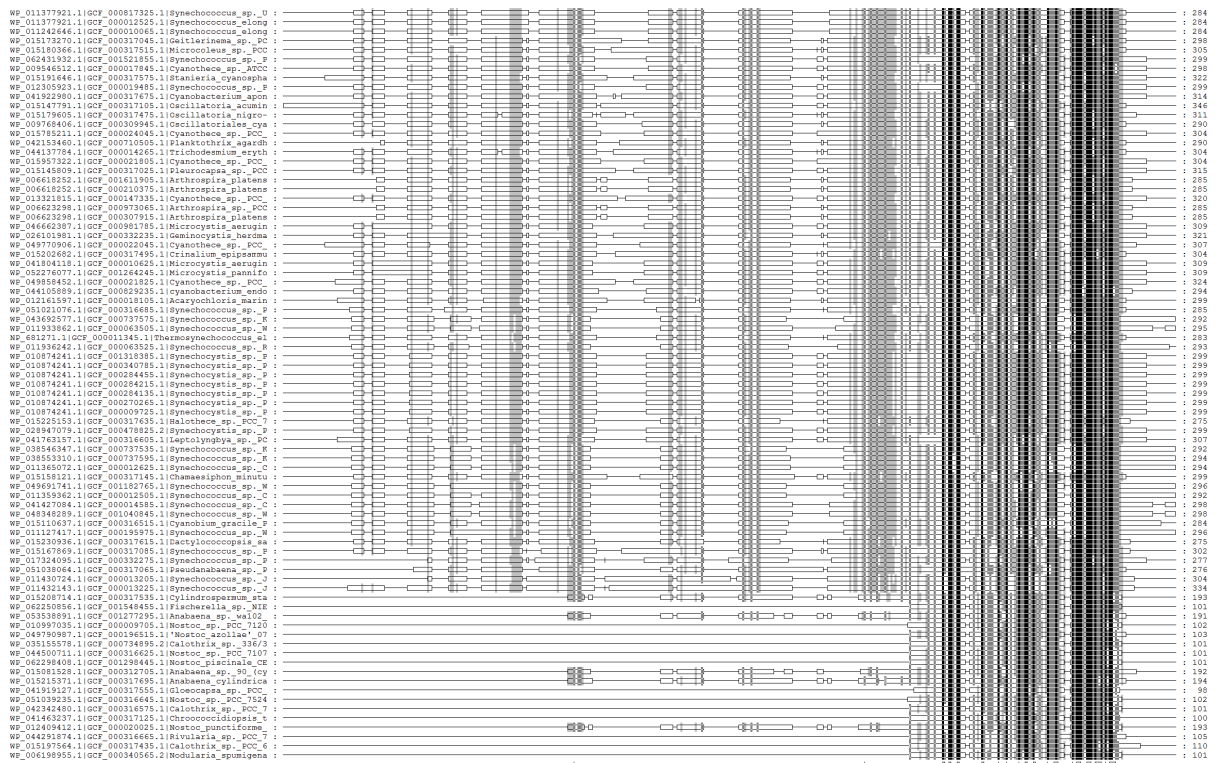

Figure S2: Multiple sequence alignment of KaiA. Conserved regions are highlight:  $\leq 100\%$  (black),  $\leq 80\%$  (grey),  $\leq 60\%$  (light grey),  $\leq 40\%$  (white).

Table S1: Proteins of the circadian clock used as queries for the reciprocal BLAST analysis.

| Organism Name                           | Function | Protein Name | Gene ID         |
|-----------------------------------------|----------|--------------|-----------------|
| <i>Synechococcus elongatus</i> PCC 7942 | Core     | KaiA         | Synpcc7942.1218 |
|                                         |          | KaiB         | Synpcc7942.1217 |
|                                         |          | KaiC         | Synpcc7942.1216 |
|                                         | Input    | Pex          | Synpcc7942.0677 |
|                                         |          | LdpA         | Synpcc7942.0624 |
|                                         |          | NhtA         | Synpcc7942.2160 |
|                                         |          | PrkE         | Synpcc7942.0600 |
|                                         |          | IrcA         | Synpcc7942.2383 |
|                                         |          | CdpA         | Synpcc7942.1604 |
|                                         |          | Input/Output | CikA            |
| <i>Synechocystis</i> sp. PCC 6803       | Core     | SasA         | Synpcc7942.2114 |
|                                         |          | LabA         | Synpcc7942.1891 |
|                                         |          | LalA         | Synpcc7942.1143 |
|                                         | Output   | Crm          | Synpcc7942.0096 |
|                                         |          | RpaA         | Synpcc7942.0095 |
|                                         |          | RpaB         | Synpcc7942.1453 |
|                                         |          | CpmA         | Synpcc7942.1168 |
|                                         | Core     | KaiB1        | slr0757         |
|                                         |          | KaiC1        | slr0758         |
|                                         |          | KaiB2        | sl11596         |
| KaiC2                                   |          | sl11595      |                 |
| KaiB3                                   |          | sl10486      |                 |
| KaiC3                                   | slr1942  |              |                 |



Table S2: **Distribution of *Synechococcus* 7942 based circadian clock proteins in the four main groups.** The percentage indicates the coverage of the orthologs per group.

| Group          | Core Clock                                      | Input Pathway                                                                                                            | Output Pathway                                                                                                                           |
|----------------|-------------------------------------------------|--------------------------------------------------------------------------------------------------------------------------|------------------------------------------------------------------------------------------------------------------------------------------|
| Cyanobacteria  | KaiA (94.29%),<br>KaiB (94.29%),<br>KaiC (100%) | Pex (62.86%),<br>LdpA (97.14%),<br>CikA (94.29%),<br>NhtA (48.57%),<br>PrkE (85.71%),<br>IrcA (97.14%),<br>CdpA (74.29%) | CikA (94.29%),<br>SasA (100%),<br>LabA (88.57%),<br>LalA (91.43%),<br>Crm (45.71%),<br>RpaA (97.14%),<br>RpaB (100%),<br>CpmA (97.14%)   |
| Proteobacteria | KaiB (28.13%),<br>KaiC (100%)                   | CikA (56.25%),<br>NhtA (26.56%),<br>PrkE (51.56%)                                                                        | CikA (56.25%),<br>SasA (32.81%),<br>LabA (4.69%),<br>LalA (39.06%),<br>Crm (20.31%),<br>RpaA (7.81%),<br>RpaB (48.44%),<br>CpmA (21.86%) |
| Archaea        | KaiB (6.06%),<br>KaiC (100%)                    | CikA (12.12%),<br>NhtA (22.73%),<br>PrkE (13.64%)                                                                        | CikA (12.12%),<br>SasA (3.03%),<br>LabA (1.51%),<br>LalA (33.33%),<br>Crm (7.58%),<br>CpmA (63.64%)                                      |
| Other          | KaiB (31.43%),<br>KaiC (100%)                   | CikA (25.71%),<br>NhtA (17.14%),<br>PrkE (71.43%),<br>IrcA (54.29%)                                                      | CikA (25.71%),<br>SasA (31.43%),<br>LalA (5.71%),<br>Crm (2.86%),<br>RpaA (11.43%),<br>RpaB (48.57%),<br>CpmA (51.43%)                   |

**Table S3: A collection of circadian and diurnal expression datasets in the cyanobacterial clade.** Datasets with assigned abbreviation were used to determine the core oscillatory genome. Information is provided about the ability to fix nitrogen, the habitat (freshwater F, saltwater S), the total number of genes, the publication reference, the absolute and relative number of diurnally expressed genes reported in the original publications, the applied light and sampling schema, the experimental culture conditions, and the methods for microarray normalisation and oscillating gene detection. References to datasets employed in the following comparison are shown bold.

| Strain                                  | Strain Abbrev. | N <sub>2</sub> Fixation | Habitat | Total Genes | Ref. Dataset Abbrev. | Diurnal Genes | Light Conditions                  | Culture Conditions                                                       | Normalization / Oscillation Detection                        |
|-----------------------------------------|----------------|-------------------------|---------|-------------|----------------------|---------------|-----------------------------------|--------------------------------------------------------------------------|--------------------------------------------------------------|
| <i>Prochlorococcus marinus</i> MED4     | ProMED4        | -                       | M       | 1766        | [133] zinser09       | 1403 (79%)    | LD (14:10, $T_{samp}$ 2h)         | Pro99 Medium, stirred, 24°C, Batch                                       | RMA, Fourier Analysis                                        |
| <i>Synechocystis</i> sp. PCC 6803       | Syn6803        | -                       | F       | 3628        | [76] leh13           | 1133 (31%)    | LD (12:12, $T_{samp}$ ir-reg.)    | BG11 Medium, air bubbling, 30°C, Batch                                   | LOS, Fourier Analysis                                        |
|                                         |                |                         |         |             | [103] beck14         | (27%)         | LD (12:12, $T_{samp}$ 2h)         | BG11 Medium, air bubbling, 30°C, Batch                                   | LOS, Fourier Analysis                                        |
|                                         |                |                         |         |             | [72] -               | 1349 (37%)    | LD (14:10, $T_{samp}$ 2h)         | BG11 Medium, stirred, 3% CO <sub>2</sub> air bubbling, 27°C, Turbidostat | Standorf Database standard, ANOVA and correlation with light |
|                                         |                |                         |         |             | [73] -               | 237 (9%)      | LL ( $T_{samp}$ 4h)               | BG11 Medium, air bubbling, stirred, 30°C, Batch with manual dilution     | LOWESS, Cosiner modified                                     |
| <i>Synechococcus elongatus</i> PCC 7942 | Syc7942        | -                       | F       | 2719        | [113] vijayan09      | 1748 (64%)    | LL ( $T_{samp}$ 4h)               | BG11 Medium, 1% air CO <sub>2</sub> bubbling, 30°C, Continuous Culture   | Loess and Quantile, Fourier Analysis                         |
|                                         |                |                         |         |             | [101] ito09          | 800 (29%)     | LL ( $T_{samp}$ 2h)               | BG11 Medium, 30°C, Continuous Culture                                    | Replicate Mean Polishing, Correlation to Sine                |
| <i>Microcystis aeruginosa</i> PCC 7806  | Mic7806        | -                       | F       | 6360        | [134] straub11       | 1344 (21%)    | LD (12:12, $T_{samp}$ ir-reg.)    | BG11 Medium, 1% air CO <sub>2</sub> bubbling, 22°C, Batch                | LOWESS, significant difference to CT0                        |
| <i>Anabaena</i> sp. PCC 7120            | Ana7120        | •                       | F       | 6222        | [75] kushige13       | 78 (1.25%)    | LL ( $T_{samp}$ 4h)               | BG11 + N Medium, 30°C, Continuous Culture                                | Replicate Mean Polishing, Correlation to Sine                |
| <i>Cyanothece</i> ATCC 51142            | Cyn51142       | •                       | M       | 5354        | [114] stoekel08      | 1445 (≈ 30%)  | LD (12:12, $T_{samp}$ 4h)         | ASP2 Medium, 30°C, air bubbling, Batch                                   | LOWESS, Correlation Network                                  |
|                                         |                |                         |         |             | [115] toepel08       | 1424 (≈ 20%)  | LD (12:12)/24h, LL $T_{samp}$ 4h) | ASP2 Medium, 30°C, Airlift Bioreactor                                    | LOWESS, Differential Expression                              |
|                                         |                |                         |         |             | [74] -               | 1400 (27%)    | LD (6:6, $T_{samp}$ 2h)           | ASP2 Medium, 30°C, Airlift Bioreactor                                    | LOWESS, Correlation Network                                  |

Table S4: **Oligonucleotides used for cloning.**

| Number | Primer Name                                 | Primer Sequence                        | ORF                  |
|--------|---------------------------------------------|----------------------------------------|----------------------|
| 1      | fw-kaiC1-Syn6714-BamHI                      | CTACGGATCCAACCTCACCCA<br>TCGTTAACG     | D082_30580           |
| 2      | rev-kaiC1-Syn6714-NotI                      | GAAGCGGCCCGCCTACTCGAC<br>GGTTTTATC     | D082_30580           |
| 3      | fw-kaiC1-Npun29133-BamHI                    | CTACGGATCCAGTCAAACG<br>AGCAAG          | Npun_R2886           |
| 4      | rev-kaiC1-Npun29133-NotI                    | CGAAGCGGCCGCTTAGGGTT<br>CGGAAC         | Npun_R2886           |
| 5      | fw-kaiC1-Cy7424-BamHI                       | CATAGGATCCAATGAACCCA<br>TTCCCAACG      | PCC7424_0599         |
| 6      | rev-kaiC1-Cy7424-NotI                       | CATTGCGGCCGCTTATTCAT<br>CTAAAGTTTTATC  | PCC7424_0599         |
| 7      | fw-kaiC3-Cy7424-BamHI                       | CGAAGGATCCAATCAAGACA<br>ACGAAC         | PCC7424_3006         |
| 8      | rev-kaiC3-Cy7424-NotI                       | CTGTGCGGCCGCTAAGACC<br>GTTCTTCAAAC     | PCC7424_3006         |
| 9      | fw-kaiC3-Mic7806-BamHI                      | CTACGGATCCACGCAAATA<br>ATCCCCTAG       | IPF_2046             |
| 10     | rev-kaiC3-Mic7806-NotI                      | GAAGCGGCCCGCCTAACTACG<br>ATCCTCA       | IPF_2046             |
| 11     | fw-KaiC3-PH_RS03935<br>BamHI (DSM 12428)    | CCCGGATCCGATGCTCTTAA<br>TTGTTGGAACCTCC | Gene ID:<br>1443164  |
| 12     | rev-KaiC3-PH_RS03935<br>HindIII (DSM 12428) | CGGGGAAGCTTTTACTCATA<br>AATTTCCACCCCTC | Gene ID:<br>1443164  |
| 13     | fw-KaiC3-OCC_RS02010<br>PstI (DSM 5473)     | GGGCTGCAGATGAGCAGAAC<br>GGGAATTG       | Gene ID:<br>16548747 |
| 14     | rev-KaiC3-OCC_RS02010<br>HindIII (DSM 5473) | GCCGGGAAGCTTTTATTCAT<br>AAATTTCCACCC   | Gene ID:<br>16548747 |

Table S5: **Diurnal core CLOGs across cyanobacterial strains** excluding *Microcystis aeruginosa* PCC 7806. In every CLOG (row) at least one gene of each of the considered datasets (columns) exhibited diurnal expression.

| Syn6803 | Syc7942 | ProMED4 | Cyn51142 | Ana7120 | Function                          |
|---------|---------|---------|----------|---------|-----------------------------------|
| sll0158 | 1085    | PMM0584 | cce_2248 | all0713 | 1,4-alpha-glucan branching enzyme |
| sll1817 | 2210    | PMM1536 | cce_4038 | all4192 | 30S ribosomal protein S11         |
| sll1096 | 0887    | PMM1511 | cce_4091 | all4340 | 30S ribosomal protein S12         |
| ssl3437 | 2223    | PMM1549 | cce_4023 | asl4206 | 30S ribosomal protein S17         |
| ssl3432 | 2228    | PMM1554 | cce_4018 | asl4211 | 30S ribosomal protein S19         |
| sll1260 | 2530    | PMM0753 | cce_0705 | all4792 | 30S ribosomal protein S2          |
| sll1804 | 2226    | PMM1552 | cce_4020 | all4209 | 30S ribosomal protein S3          |
| sll1812 | 2216    | PMM1542 | cce_4031 | all4199 | 30S ribosomal protein S5          |
| sll1097 | 0886    | PMM1510 | cce_4090 | all4339 | 30S ribosomal protein S7          |
| sll1809 | 2219    | PMM1545 | cce_4028 | all4202 | 30S ribosomal protein S8          |
| sll1822 | 2205    | PMM1531 | cce_4043 | all4187 | 30S ribosomal protein S9          |
| sll1821 | 2206    | PMM1532 | cce_4042 | all4188 | 50S ribosomal protein L13         |
| sll1802 | 2229    | PMM1555 | cce_4017 | all4212 | 50S ribosomal protein L2          |
| slr1678 | 1219    | PMM1344 | cce_1391 | all0147 | 50S ribosomal protein L21         |
| sll1803 | 2227    | PMM1553 | cce_4019 | all4210 | 50S ribosomal protein L22         |
| sll1807 | 2221    | PMM1547 | cce_4025 | asl4204 | 50S ribosomal protein L24         |
| sll1799 | 2232    | PMM1558 | cce_4013 | all4215 | 50S ribosomal protein L3          |
| sll1800 | 2231    | PMM1557 | cce_4015 | all4214 | 50S ribosomal protein L4          |
| sll1810 | 2218    | PMM1544 | cce_4029 | all4201 | 50S ribosomal protein L6          |
| sll0329 | 0039    | PMM0770 | cce_3746 | alr5275 | 6-phosphogluconate dehydrogenase  |
| sll1323 | 0333    | PMM1454 | cce_4485 | all0008 | ATP synthase subunit b' of CF(0)  |

|                  |            |         |                    |                  |                                                                               |
|------------------|------------|---------|--------------------|------------------|-------------------------------------------------------------------------------|
| sll1908          | 1501       | PMM1354 | cce_2134           | alr1890          | D-3-phosphoglycerate dehydrogenase                                            |
| sll0519          | 1343       | PMM0160 | cce_2224           | alr0223          | NADH dehydrogenase subunit 1                                                  |
| slr0331          | 1976       | PMM0150 | cce_4299           | alr3957          | NADH dehydrogenase subunit 4 (involved in photosystem-1 cyclic electron flow) |
| sll0689          | 2359       | PMM1600 | cce_1688, cce_2468 | alr0091, all1303 | Na <sup>+</sup> /H <sup>+</sup> antiporter                                    |
| sll1818          | 2209       | PMM1535 | cce_4039           | all4191          | RNA polymerase alpha subunit                                                  |
| slr1265          | 1523       | PMM1484 | cce_3838           | alr1595          | RNA polymerase gamma-subunit                                                  |
| sll0306, sll2012 | 1746, 0672 | PMM1629 | cce_3594, cce_0644 | alr3810, alr3800 | RNA polymerase group 2 sigma factor                                           |
| slr1424          | 1740       | PMM0021 | cce_2372           | alr5066          | UDP-N-acetylenolpyruvoylglucosamine reductase                                 |
| sll0108          | 0442       | PMM0263 | cce_3261           | alr0991          | ammonium/methylammonium permease                                              |
| ssl2667          | 0450       | PMM0418 | cce_1017           | asr1309          | an assembly factor for iron-sulfur clusters                                   |
| slr0585          | 0009       | PMM1707 | cce_4370           | alr4798          | argininosuccinate synthetase                                                  |
| slr0549          | 1848       | PMM1654 | cce_0293           | all3680          | aspartate beta-semialdehyde dehydrogenase                                     |
| slr1720          | 1313       | PMM1688 | cce_4152           | all2436          | aspartyl-tRNA synthetase                                                      |
| sll1498          | 2122       | PMM0951 | cce_0902           | alr1155          | carbamoyl-phosphate synthase small chain                                      |
| sll1028, sll1029 | 1421       | PMM0549 | cce_4283, cce_4282 | alr0867, all0868 | carbon dioxide concentrating mechanism protein CcmK                           |
| slr1390          | 0942       | PMM0743 | cce_1270           | all3642          | cell division protein FtsH                                                    |
| sll0109          | 1915       | PMM1181 | cce_3372           | all4012          | chorismate mutase                                                             |
| slr0757          | 1217       | PMM1343 | cce_0423           | alr2885          | circadian clock protein KaiB homolog                                          |
| slr1138          | 2604       | PMM0444 | cce_1975           | alr0952          | cytochrome c oxidase subunit III                                              |
| slr0550          | 1847       | PMM1653 | cce_0294           | all3679          | dihydrodipicolinate synthase                                                  |
| slr1626          | 0040       | PMM0591 | cce_4420           | alr3512          | dihydroneopterin aldolase                                                     |
| slr2026          | 2303       | PMM0830 | cce_4305           | alr4386          | dihydropteroate synthase                                                      |
| slr1051          | 0126       | PMM0282 | cce_0460           | all4391          | enoyl-[acyl-carrier-protein] reductase                                        |
| sll0018          | 1443       | PMM0781 | cce_1357           | all4563          | fructose-bisphosphate aldolase, class II                                      |
| slr1843          | 2334       | PMM1074 | cce_2536           | all4019          | glucose 6-phosphate dehydrogenase                                             |
| slr0638          | 2457       | PMM1165 | cce_3990           | all1985          | glycyl-tRNA synthetase alpha chain                                            |
| slr1718          | 2589       | PMM0614 | cce_1018           | all2568          | hypothetical protein                                                          |
| sll0098          | 1758       | PMM1481 | cce_2727           | all0355          | hypothetical protein                                                          |
| sll0996          | 2374       | PMM1305 | cce_2810           | alr1312          | hypothetical protein                                                          |
| slr1847          | 0464       | PMM0020 | cce_4379           | alr5067          | hypothetical protein                                                          |
| slr1471          | 1617       | PMM1186 | cce_1364           | alr3415          | hypothetical protein                                                          |
| slr1577          | 0426       | PMM0909 | cce_0429           | all5166          | hypothetical protein                                                          |
| ssr0332          | 0658       | PMM1563 | cce_4619           | asr4076          | hypothetical protein                                                          |
| slr0742          | 2023       | PMM1491 | cce_1842           | alr3828          | hypothetical protein                                                          |
| ssl0353          | 2017       | PMM0061 | cce_0650           | asl0940          | hypothetical protein                                                          |
| slr0362          | 2396       | PMM0789 | cce_0268           | alr3102          | hypothetical protein                                                          |
| sll1898          | 2601       | PMM0447 | cce_4599           | all0949          | hypothetical protein                                                          |
| slr1896          | 0286       | PMM0390 | cce_2055           | all0876          | hypothetical protein                                                          |
| sll0372          | 0362       | PMM0239 | cce_2501           | all2849          | hypothetical protein                                                          |
| sll1866          | 1864       | PMM0319 | cce_4203           | alr0116          | hypothetical protein                                                          |
| sll0854          | 0826       | PMM1517 | cce_3387           | all3378          | hypothetical protein                                                          |
| slr0506          | 2503       | PMM0542 | cce_0320           | all1743          | light-dependent NADPH-protochlorophyllide oxidoreductase                      |
| slr0772          | 1838       | PMM0544 | cce_1954           | alr3441          | light-independent protochlorophyllide reductase subunit ChlB                  |
| slr1540          | 1826       | PMM0797 | cce_3779           | alr4831          | mRNA-binding protein                                                          |

|                                 |                        |         |                                                 |                                                         |                                                                                                               |
|---------------------------------|------------------------|---------|-------------------------------------------------|---------------------------------------------------------|---------------------------------------------------------------------------------------------------------------|
| slr1055                         | 2137                   | PMM0831 | cce_4358                                        | all4365                                                 | magnesium protoporphyrin IX chelatase subunit H                                                               |
| slr2033                         | 1179                   | PMM0295 | cce_1309                                        | alr3843                                                 | membrane-associated rubredoxin, essential for photosystem I assembly                                          |
| sll0902                         | 2514                   | PMM1263 | cce_3251                                        | alr4907                                                 | ornithine carbamoyltransferase                                                                                |
| sll1553                         | 1293                   | PMM0871 | cce_1321                                        | alr4958                                                 | phenylalanyl-tRNA synthetase                                                                                  |
| sll0684                         | 2441                   | PMM0725 | cce_0883                                        | all4572                                                 | phosphate transport ATP-binding protein PstB homolog                                                          |
| slr0597                         | 0396                   | PMM0266 | cce_4354                                        | all3093                                                 | phosphoribosyl aminoimidazole carboxy formyl formyltransferase/inosinemonophosphate cyclohydrolase (PUR-H(J)) |
| slr1645                         | 0343                   | PMM0507 | cce_3633                                        | all1258                                                 | photosystem II 11 kD protein                                                                                  |
| sll0851                         | 0656                   | PMM1158 | cce_0659                                        | alr4291                                                 | photosystem II CP43 protein                                                                                   |
| slr1311,<br>sll1867,<br>slr1181 | 0893,<br>1389,<br>0424 | PMM0223 | cce_3411,<br>cce_0267,<br>cce_3501,<br>cce_0636 | alr3742,<br>alr4866,<br>alr4592,<br>alr3727,<br>all3572 | photosystem II D1 protein                                                                                     |
| slr0906                         | 0697                   | PMM0315 | cce_1837                                        | all0138                                                 | photosystem II core light harvesting protein                                                                  |
| sll0427                         | 0294                   | PMM0228 | cce_2572                                        | all3854                                                 | photosystem II manganese-stabilizing polypeptide                                                              |
| sll0849,<br>slr0927             | 1637, 0655             | PMM1157 | cce_2485,<br>cce_0660                           | alr4290,<br>alr4548                                     | photosystem II reaction center D2 protein                                                                     |
| sll0171                         | 2308                   | PMM1687 | cce_4346                                        | all4609                                                 | probable aminomethyltransferase                                                                               |
| slr1673                         | 1199                   | PMM1299 | cce_0402                                        | alr0175                                                 | probable tRNA/rRNA methyltransferase                                                                          |
| slr0774                         | 0142                   | PMM0929 | cce_4646                                        | all0121                                                 | protein-export membrane protein SecD                                                                          |
| sll1786                         | 1521                   | PMM1486 | cce_3489                                        | alr1593                                                 | putative deoxyribonuclease, tatD homolog                                                                      |
| slr2034                         | 1178                   | PMM0296 | cce_1308                                        | alr3844                                                 | putative homolog of plant HCF136, which is essential for stability or assembly of photosystem II              |
| sll1841                         | 1068                   | PMM0405 | cce_2750                                        | alr3606                                                 | pyruvate dehydrogenase dihydrolipoamide acetyltransferase component (E2)                                      |
| sll1282                         | 2244                   | PMM1643 | cce_4679                                        | alr3993                                                 | riboflavin synthase beta subunit                                                                              |
| slr0194                         | 0584                   | PMM1489 | cce_0103                                        | all0888                                                 | ribose 5-phosphate isomerase                                                                                  |
| slr0012                         | 1427                   | PMM0551 | cce_3164                                        | alr1526                                                 | ribulose biphosphate carboxylase small subunit                                                                |
| slr0743                         | 2022                   | PMM1492 | cce_1841                                        | alr3829                                                 | similar to N utilization substance protein                                                                    |
| ssr1600                         | 2121                   | PMM0950 | cce_1801                                        | asr1156                                                 | similar to anti-sigma f factor antagonist                                                                     |
| sll1820                         | 2207                   | PMM1533 | cce_4041                                        | all4189                                                 | tRNA pseudouridine synthase 1                                                                                 |
| sll1980                         | 2128                   | PMM0242 | cce_0972                                        | alr0570                                                 | thiol:disulfide interchange protein TrxA                                                                      |
| sll1615                         | 1582                   | PMM0189 | cce_4596                                        | all4677                                                 | thiophen and furan oxidation protein                                                                          |
| sll0755                         | 2309                   | PMM0856 | cce_2409                                        | alr4641                                                 | thioredoxin peroxidase                                                                                        |
| slr1793                         | 2297                   | PMM0519 | cce_4687                                        | all2563                                                 | transaldolase                                                                                                 |
| sll1957                         | 0688                   | PMM0714 | cce_3556                                        | alr2766                                                 | transcriptional regulator                                                                                     |
| slr1884                         | 1308                   | PMM0598 | cce_3534                                        | all1269                                                 | tryptophanyl-tRNA synthetase                                                                                  |



## References

- 555
- 556 [1] Y. Ouyang, C. R. Andersson, T. Kondo, S. S. Golden, and C. H. Johnson. Resonating circadian  
557 clocks enhance fitness in cyanobacteria. *Proceedings of the National Academy of Sciences of the*  
558 *United States of America*, 95(15):8660–4, 1998.
- 559 [2] M. A. Woelfle, Y. Ouyang, K. Phanvijhitsiri, and C. H. Johnson. The adaptive value of circadian  
560 clocks: an experimental assessment in cyanobacteria. *Current Biology*, 14(16):1481–6, 2004.
- 561 [3] M. J. Simons. The evolution of the cyanobacterial posttranslational clock from a primitive "phoscil-  
562 lator". *Journal of Biological Rhythms*, 24(3):175–82, 2009.
- 563 [4] J.L. Ditty, S.B. Williams, and S.S. Golden. A Cyanobacterial Circadian Timing Mechanism. *Annual*  
564 *Review of Genetics*, 37(1):513–543, 2003.
- 565 [5] C. H. Johnson, P. L. Stewart, and M. Egly. The cyanobacterial circadian system: from biophysics  
566 to bioevolution. *Annual Review of Biophysics*, 40:143–67, 2011.
- 567 [6] S. S. Golden and S. R. Canales. Cyanobacterial circadian clocks—timing is everything. *Nature*  
568 *Review Microbiology*, 1(3):191–9, 2003.
- 569 [7] C. S. Pittendrigh. Temporal organization: reflections of a darwinian clock-watcher. *Annual Review*  
570 *of Physiology*, 55:16–54, 1993.
- 571 [8] B. M. Sweeney and M. B. Borgese. A circadian rhythm in cell division in a prokaryote, the  
572 cyanobacterium *synechococcus wh7803*. *Journal of Phycology*, 25(1):183–186, 1989.
- 573 [9] A. Mitsui, S. Kumazawa, A. Takahashi, H. Ikemoto, S. Cao, and T. Arai. Strategy by which  
574 nitrogen-fixing unicellular cyanobacteria grow photoautotrophically. *Nature*, 323(6090):720–722,  
575 1986.
- 576 [10] T. C. Huang and T. J. Chow. New type of n-2-fixing unicellular cyanobacterium (blue-green-alga).  
577 *FEMS Microbiology Letters*, 36(1):109–110, 1986.
- 578 [11] N. Grobbelaar, T. C. Huang, H. Y. Lin, and T. J. Chow. Dinitrogen-fixing endogenous rhythm in  
579 *synechococcus rf-1*. *FEMS Microbiology Letters*, 37(2):173–177, 1986.
- 580 [12] T. C. Huang and T. J. Chow. Characterization of the rhythmic nitrogen-fixing activity of *syne-*  
581 *chococcus sp rf-1* at the transcription level. *Current Microbiology*, 20(1):23–26, 1990.
- 582 [13] J. Tomita, M. Nakajima, T. Kondo, and H. Iwasaki. No transcription-translation feedback in  
583 circadian rhythm of kaic phosphorylation. *Science*, 307(5707):251–4, 2005.
- 584 [14] M. Nakajima, K. Imai, H. Ito, T. Nishiwaki, Y. Murayama, H. Iwasaki, T. Oyama, and T. Kondo.  
585 Reconstitution of circadian oscillation of cyanobacterial kaic phosphorylation in vitro. *Science*,  
586 308(5720):414–5, 2005.
- 587 [15] J. L. Ditty, S. R. Canales, B. E. Anderson, S. B. Williams, and S. S. Golden. Stability of the  
588 *synechococcus elongatus pcc 7942* circadian clock under directed anti-phase expression of the kai  
589 genes. *Microbiology*, 151(Pt 8):2605–2613, 2005.
- 590 [16] R. S. Edgar, E. W. Green, Y. Zhao, G. van Ooijen, M. Olmedo, X. Qin, Y. Xu, M. Pan, U. K.  
591 Valekunja, K. A. Feeney, E. S. Maywood, M. H. Hastings, N. S. Baliga, M. Merrow, A. J. Millar,  
592 C. H. Johnson, C. P. Kyriacou, J. S. O'Neill, and A. B. Reddy. Peroxiredoxins are conserved  
593 markers of circadian rhythms. *Nature*, 485(7399):459–64, 2012.
- 594 [17] J. S. O'Neill and A. B. Reddy. Circadian clocks in human red blood cells. *Nature*, 469(7331):498–  
595 503, 2011.
- 596 [18] J. S. O'Neill, G. van Ooijen, L. E. Dixon, C. Troein, F. Corellou, F.-Y. Bouget, A. B. Reddy, and  
597 A. J. Millar. Circadian rhythms persist without transcription in a eukaryote. *Nature*, 469(7331):554–  
598 8, 2011.
- 599 [19] C. R. McClung. Circadian rhythms in plants. *Annual Review of Plant Physiology and Plant*  
600 *Molecular Biology*, 52:139–162, 2001.

- 601 [20] Natalia B Ivleva, Matthew R Bramlett, Paul a Lindahl, and Susan S Golden. Ldpa: a component  
602 of the circadian clock senses redox state of the cell. *The EMBO Journal*, 24(6):1202–1210, 2005.
- 603 [21] Gopal K. Pattanayak and Michael J. Rust. The Cyanobacterial Clock and Metabolism. *Current*  
604 *Opinion in Microbiology*, 18:90–95, 2014.
- 605 [22] Y.-I. Kim, D. J. Vinyard, G. M. Ananyev, G. C. Dismukes, and S. S. Golden. Oxidized quinones  
606 signal onset of darkness directly to the cyanobacterial circadian oscillator. *Proceedings of the*  
607 *National Academy of Sciences of the United States of America*, 109(44):17765–17769, 2012.
- 608 [23] Y. Hihara, K. Sonoike, M. Kanehisa, and M. Ikeuchi. Dna microarray analysis of redox-responsive  
609 genes in the genome of the cyanobacterium *synechocystis* sp. strain pcc 6803. *Journal of Bacteri-*  
610 *ology*, 185(5):1719–25, 2003.
- 611 [24] F. Hayashi, H. Suzuki, R. Iwase, T. Uzumaki, A. Miyake, J. R. Shen, K. Imada, Y. Furukawa,  
612 K. Yonekura, K. Namba, and M. Ishiura. Atp-induced hexameric ring structure of the cyanobacte-  
613 rial circadian clock protein kaic. *Genes to Cells*, 8(3):287–96, 2003.
- 614 [25] T. Mori, S. V. Saveliev, Y. Xu, W. F. Stafford, M. M. Cox, R. B. Inman, and C. H. Johnson.  
615 Circadian clock protein kaic forms atp-dependent hexameric rings and binds dna. *Proceedings of*  
616 *the National Academy of Sciences of the United States of America*, 99(26):17203–8, 2002.
- 617 [26] T Nishiwaki, H Iwasaki, M Ishiura, and T Kondo. Nucleotide binding and autophosphorylation of  
618 the clock protein KaiC as a circadian timing process of cyanobacteria. *Proceedings of the National*  
619 *Academy of Sciences of the United States of America*, 97(1):495–499, 2000.
- 620 [27] Taeko Nishiwaki and Takao Kondo. Circadian autodephosphorylation of cyanobacterial clock  
621 protein KaiC occurs via formation of ATP as intermediate. *Journal of Biological Chemistry*,  
622 287(22):18030–18035, 2012.
- 623 [28] Y.-I. Kim, G. Dong, Jr. Carruthers, C. W., S. S. Golden, and A. LiWang. The day/night switch  
624 in kaic, a central oscillator component of the circadian clock of cyanobacteria. *Proceedings of the*  
625 *National Academy of Sciences of the United States of America*, 105(35):12825–30, 2008.
- 626 [29] R. Pattanayek, D. R. Williams, S. Pattanayek, Y. Xu, T. Mori, C. H. Johnson, P. L. Stewart,  
627 and M. Egli. Analysis of kaia-kaic protein interactions in the cyano-bacterial circadian clock using  
628 hybrid structural methods. *The EMBO Journal*, 25(9):2017–28, 2006.
- 629 [30] Michael J Rust, Susan S Golden, and Erin K O’Shea. Light-driven changes in energy metabolism  
630 directly entrain the cyanobacterial circadian oscillator. *Science*, 331(6014):220–3, 2011.
- 631 [31] Y. Kitayama, H. Iwasaki, T. Nishiwaki, and T. Kondo. Kaib functions as an attenuator of kaic  
632 phosphorylation in the cyanobacterial circadian clock system. *The EMBO Journal*, 22(9):2127–34,  
633 2003.
- 634 [32] S. B. Williams, I. Vakonakis, S. S. Golden, and A. C. LiWang. Structure and function from  
635 the circadian clock protein kaia of *synechococcus elongatus*: a potential clock input mechanism.  
636 *Proceedings of the National Academy of Sciences of the United States of America*, 99(24):15357–62,  
637 2002.
- 638 [33] T. L. Wood, J. Bridwell-Rabb, Y. I. Kim, T. Gao, Y. G. Chang, A. LiWang, D. P. Barondeau,  
639 and S. S. Golden. The kaia protein of the cyanobacterial circadian oscillator is modulated by a  
640 redox-active cofactor. *Proceedings of the National Academy of Sciences of the United States of*  
641 *America*, 107(13):5804–9, 2010.
- 642 [34] Shinsuke Kutsuna, Takao Kondo, and Setsuyuki Aoki. A Period-Extender Gene , pex , That  
643 Extends the Period of the Circadian Clock in the Cyanobacterium *Synechococcus* sp . Strain A  
644 Period-Extender Gene , pex , That Extends the Period of the Circadian Clock in the Cyanobac-  
645 terium *Synechococcus* sp . Strain PCC. *Journal of Bacteriology*, 180(8):2167–2174, 1998.
- 646 [35] Shinsuke Kutsuna, Takao Kondo, Haruki Ikegami, Tatsuya Uzumaki, Mitsunori Katayama, and  
647 Masahiro Ishiura. The circadian clock-related gene pex regulates a negative cis element in the kaiA  
648 promoter region. *Journal of Bacteriology*, 189(21):7690–7696, 2007.

- 649 [36] Natalia B Ivleva, Tiyu Gao, Andy C LiWang, and Susan S Golden. Quinone sensing by the circadian  
650 input kinase of the cyanobacterial circadian clock. *Proceedings of the National Academy of Sciences*  
651 *of the United States of America*, 103(46):17468–17473, 2006.
- 652 [37] O Schmitz, M Katayama, S B Williams, T Kondo, and S S Golden. Cika, a bacteriophytochrome  
653 that resets the cyanobacterial circadian clock. *Science*, 289(5480):765–768, 2000.
- 654 [38] Shannon R. Mackey, Jong Soon Choi, Yohko Kitayama, Hideo Iwasaki, Guogang Dong, and Susan S.  
655 Golden. Proteins found in a CikA interaction assay link the circadian clock, metabolism, and cell  
656 division in *synechococcus elongatus*. *Journal of Bacteriology*, 190(10):3738–3746, 2008.
- 657 [39] Hideo Iwasaki, Stanly B. Williams, Yohko Kitayama, Masahiro Ishiura, Susan S. Golden, and Takao  
658 Kondo. A KaiC-interacting sensory histidine kinase, SasA, necessary to sustain robust circadian  
659 oscillation in cyanobacteria. *Cell*, 101(2):223–233, 2000.
- 660 [40] R. M. Smith and S. B. Williams. Circadian rhythms in gene transcription imparted by chromosome  
661 compaction in the cyanobacterium *synechococcus elongatus*. *Proceedings of the National Academy*  
662 *of Sciences of the United States of America*, 103(22):8564–9, 2006.
- 663 [41] Naoki Takai, Masato Nakajima, Tokitaka Oyama, Ryotaku Kito, Chieko Sugita, Mamoru Sugita,  
664 Takao Kondo, and Hideo Iwasaki. A KaiC-associating SasA-RpaA two-component regulatory sys-  
665 tem as a major circadian timing mediator in cyanobacteria. *Proceedings of the National Academy*  
666 *of Sciences of the United States of America*, 103(32):12109–12114, 2006.
- 667 [42] Mitsumasa Hanaoka, Naoki Takai, Norimune Hosokawa, Masayuki Fujiwara, Yuki Akimoto, Nami  
668 Kobori, Hideo Iwasaki, Takao Kondo, and Kan Tanaka. RpaB, another response regulator operating  
669 circadian clock-dependent transcriptional regulation in *Synechococcus elongatus* PCC 7942. *Journal*  
670 *of Biological Chemistry*, 287(31):26321–26327, 2012.
- 671 [43] Joseph S. Markson, Joseph R. Piechura, Anna M. Puszynska, and Erin K. O’Shea. Circadian control  
672 of global gene expression by the cyanobacterial master regulator rpaA. *Cell*, 155(6):1396–1408, 2013.
- 673 [44] Andrian Gutu and Erin K. O’Shea. Two Antagonistic Clock-Regulated Histidine Kinases Time the  
674 Activation of Circadian Gene Expression. *Molecular Cell*, 50(2):288–294, 2013.
- 675 [45] Yasuhito Taniguchi, Tomoe Nishikawa, Takao Kondo, and Tokitaka Oyama. Overexpression of  
676 lalA, a paralog of labA, is capable of affecting both circadian gene expression and cell growth in  
677 the cyanobacterium *Synechococcus elongatus* PCC 7942. *FEBS Letters*, 586(6):753–759, 2012.
- 678 [46] Joseph S Boyd, Juliana R Bordowitz, Anna C Bree, and Susan S Golden. An allele of the crm gene  
679 blocks cyanobacterial circadian rhythms. *Proceedings of the National Academy of Sciences of the*  
680 *United States of America*, 110(34):13950–5, 2013.
- 681 [47] Javier Espinosa, Joseph S. Boyd, Raquel Cantos, Paloma Salinas, Susan S. Golden, and Asuncion  
682 Contreras. Cross-talk and regulatory interactions between the essential response regulator RpaB  
683 and cyanobacterial circadian clock output. *Proceedings of the National Academy of Sciences of the*  
684 *United States of America*, page 201424632, 2015.
- 685 [48] F. Moronta-Barrios, J. Espinosa, and A. Contreras. In vivo features of signal transduction by the  
686 essential response regulator rpab from *synechococcus elongatus pcc 7942*. *Microbiology*, 158(Pt  
687 5):1229–37, 2012.
- 688 [49] Mitsunori Katayama, Nicholas F. Tsinoremas, Takao Kondo, and Susan S. Golden. cpma, a gene  
689 involved in an output pathway of the cyanobacterial circadian system. *Journal of Bacteriology*,  
690 181(11):3516–3524, 1999.
- 691 [50] Yasuhito Taniguchi, Mitsunori Katayama, Rie Ito, Naoki Takai, Takao Kondo, and Tokitaka  
692 Oyama. labA : a novel gene required for negative feedback regulation of the cyanobacterial cir-  
693 cadian clock protein kaic. *Genes and Development*, pages 60–70, 2007.
- 694 [51] F. Moronta-Barrios, J. Espinosa, and A. Contreras. Negative control of cell size in the cyanobac-  
695 terium *synechococcus elongatus pcc 7942* by the essential response regulator rpab. *FEBS Letters*,  
696 587(5):504–9, 2013.
- 697 [52] V. Dvornyk. *The Circadian Clock Gear in Cyanobacteria: Assembled by Evolution*, book section 14,  
698 pages 241–258. Springer, Berlin Heidelberg, 2009.

- 699 [53] Volodymyr Dvornyk, Oxana Vinogradova, and Eviatar Nevo. Origin and evolution of circadian  
700 clock genes in prokaryotes. *Proceedings of the National Academy of Sciences of the United States*  
701 *of America*, 100(5):2495–2500, 2003.
- 702 [54] Ilka M. Axmann, Stefanie Hertel, Anika Wiegard, Anja K. Dörrich, and Annegret Wilde. Diversity  
703 of KaiC-based timing systems in marine Cyanobacteria. *Marine Genomics*, 14:3–16, 2014.
- 704 [55] Anika Wiegard, Anja K. Dörrich, Hans Tobias Deinzer, Christian Beck, Annegret Wilde, Julia  
705 Holtendorff, and Ilka M. Axmann. Biochemical analysis of three putative kaic clock proteins from  
706 *synechocystis* sp. pcc 6803 suggests their functional divergence. *Microbiology*, 159(PART 5):948–  
707 958, 2013.
- 708 [56] S. Aoki and K. Onai. *Circadian clocks of Synechocystis sp. strain PCC 6803, Thermosynechococcus*  
709 *elongatus, Prochlorococcus spp., Trichodesmium spp. and other species*. Springer Berlin Heidelberg,  
710 2009.
- 711 [57] P. Ma, T. Mori, C. Zhao, T. Thiel, and C. H. Johnson. Evolution of kaic-dependent timekeepers:  
712 A proto-circadian timing mechanism confers adaptive fitness in the purple bacterium *rhodosphe-*  
713 *domonas palustris*. *PLoS Genetics*, 12(3):e1005922, 2016.
- 714 [58] H. J. Kang, K. Kubota, H. Ming, K. Miyazono, and M. Tanokura. Crystal structure of kaic-like  
715 protein ph0186 from hyperthermophilic archaea *pyrococcus horikoshii* ot3. *Proteins*, 75(4):1035–9,  
716 2009.
- 717 [59] M. Maniscalco, J. Nannen, V. Sodi, G. Silver, P. L. Lowrey, and K. A. Bidle. Light-dependent  
718 expression of four cryptic archaeal circadian gene homologs. *Frontiers in Microbiology*, 5:79, 2014.
- 719 [60] Ivan Baca, Daniel Sprockett, and Volodymyr Dvornyk. Circadian input kinases and their homologs  
720 in cyanobacteria: Evolutionary constraints versus architectural diversification. *Journal of Molecular*  
721 *Evolution*, 70(5):453–465, 2010.
- 722 [61] Volodymyr Dvornyk, Hong Wen Deng, and Eviatar Nevo. Structure and molecular phylogeny of  
723 *sasa* genes in cyanobacteria: Insights into evolution of the prokaryotic circadian system. *Molecular*  
724 *Biology and Evolution*, 21(8):1468–1476, 2004.
- 725 [62] P. J. Cock, T. Antao, J. T. Chang, B. A. Chapman, C. J. Cox, A. Dalke, I. Friedberg, T. Hamel-  
726 ryck, F. Kauff, B. Wilczynski, and M. J. de Hoon. Biopython: freely available python tools for  
727 computational molecular biology and bioinformatics. *Bioinformatics*, 25(11):1422–3, 2009.
- 728 [63] Fernando Pérez and E. Granger. Ipython: A system for interactive scientific computing, computing  
729 in science and engineering. *Computing in Science and Engineering*, 9(3):21–29, 2007.
- 730 [64] Stefan van der Walt, S. Chris Colbert, and Gael Varoquaux. The numpy array: A structure for  
731 efficient numerical computation. *Computing in Science and Engineering*, 13(2):22–30, 2011.
- 732 [65] J. D. Hunter. Matplotlib: A 2d graphics environment. *Computing in Science and Engineering*,  
733 9(3):90–95, 2007.
- 734 [66] Wes McKinney. Data structures for statistical computing in python. In *Proceedings of the 9th*  
735 *Python in Science Conference*, volume 445, pages 51–56.
- 736 [67] D. A. Benson, I. Karsch-Mizrachi, D. J. Lipman, J. Ostell, and D. L. Wheeler. Genbank. *Nucleic*  
737 *Acids Research*, 36(Database issue):D25–30, 2008.
- 738 [68] Mitsuteru Nakao, Shinobu Okamoto, Mitsuyo Kohara, Tsunakazu Fujishiro, Takatomo Fujisawa,  
739 Shusei Sato, Satoshi Tabata, Takakazu Kaneko, and Yasukazu Nakamura. Cyanobase: the  
740 cyanobacteria genome database update 2010. *Nucleic Acids Research*, 38(Database issue):D379–  
741 D381, 2010.
- 742 [69] S. F. Altschul, T. L. Madden, A. A. Schaffer, J. Zhang, Z. Zhang, W. Miller, and D. J. Lipman.  
743 Gapped blast and psi-blast: a new generation of protein database search programs. *Nucleic Acids*  
744 *Research*, 25(17):3389–402, 1997.
- 745 [70] R. A. Fisher. On the interpretation of  $\chi^2$  from contingency tables, and the calculation of p. *Journal*  
746 *of the Royal Statistical Society*, 85(1):87–94, 1922.

- 747 [71] Yoav Benjamini and Yosef Hochberg. Controlling the false discovery rate: A practical and powerful  
748 approach to multiple testing. *Journal of the Royal Statistical Society. Series B (Methodological)*,  
749 57(1):289–300, 1995.
- 750 [72] Rochelle G. Labiosa, Kevin R. Arrigo, Chao J. Tu, Devaki Bhaya, Stephen Bay, Arthur R. Gross-  
751 man, and Jeff Shrager. Examination of diel changes in global transcript accumulation in syne-  
752 chocystis (cyanobacteria). *Journal of Phycology*, 42(3):622–636, 2006.
- 753 [73] K.-i. Kucho, K. Okamoto, Y. Tsuchiya, S. Nomura, M. Nango, M. Kanehisa, and M. Ishiura. Global  
754 analysis of circadian expression in the cyanobacterium *synechocystis* sp. strain pcc 6803. *Journal*  
755 *of Bacteriology*, 187(6):2190–9, 2005.
- 756 [74] J. R. Toepel, J. E. McDermott, T. C. Summerfield, and L. A. Sherman. Transcriptional analysis  
757 of the unicellular, diazotrophic cyanobacterium *cyanoshece* sp. 51142 grown under short day/night  
758 cycles. *Journal of Phycology*, 45(3):610–20, 2009.
- 759 [75] H. Kushige, H. Kugenuma, M. Matsuoka, S. Ehira, M. Ohmori, and H. Iwasaki. Genome-wide  
760 and heterocyst-specific circadian gene expression in the filamentous cyanobacterium *anabaena* sp.  
761 strain pcc 7120. *Journal of Bacteriology*, 195(6):1276–84, 2013.
- 762 [76] Robert Lehmann, Rainer Machné, Jens Georg, Manuela Benary, Ilka Axmann, and Ralf Steuer.  
763 How cyanobacteria pose new problems to old methods: challenges in microarray time series analysis.  
764 *BMC Bioinformatics*, 14:133, 2013.
- 765 [77] Qiong Yang, Bernardo F. Pando, Guogang Dong, Susan S. Golden, and Alexander van Oude-  
766 naarden. Circadian gating of the cell cycle revealed in single cyanobacterial cells. *Science*,  
767 327(5972):1522–1526, 2010.
- 768 [78] P. O. Westermark and H. Herzl. Mechanism for 12 hr rhythm generation by the circadian clock.  
769 *Cell Reports*, 3(4):1228–38, 2013.
- 770 [79] F. Sievers, A. Wilm, D. Dineen, T. J. Gibson, K. Karplus, W. Li, R. Lopez, H. McWilliam,  
771 M. Remmert, J. Soding, J. D. Thompson, and D. G. Higgins. Fast, scalable generation of high-  
772 quality protein multiple sequence alignments using clustal omega. *Molecular Systems Biology*, 7:539,  
773 2011.
- 774 [80] Andrew M. Waterhouse, James B. Procter, David M. A. Martin, Michèle Clamp, and Geoffrey J.  
775 Barton. Jalview version 2—a multiple sequence alignment editor and analysis workbench. *Bioin-*  
776 *formatics*, 25(9):1189–1191, 2009.
- 777 [81] Gavin E. Crooks, Gary Hon, John-Marc Chandonia, and Steven E. Brenner. Weblogo: A sequence  
778 logo generator. *Genome Research*, 14(6):1188–1190, 2004.
- 779 [82] U. K. Laemmli. Cleavage of structural proteins during the assembly of the head of bacteriophage  
780 t4. *Nature*, 227(5259):680–5, 1970.
- 781 [83] Ilka M. Axmann, Ulf Dühning, Luiza Seeliger, Anne Arnold, Jens T. Vanselow, Achim Kramer,  
782 and Annegret Wilde. Biochemical evidence for a timing mechanism in *Prochlorococcus*. *Journal of*  
783 *Bacteriology*, 191(17):5342–5347, 2009.
- 784 [84] M. Loza-Correa, L. Gomez-Valero, and C. Buchrieser. Circadian clock proteins in prokaryotes:  
785 hidden rhythms? *Frontiers in Microbiology*, 1:130, 2010.
- 786 [85] Takuro Nakayama, Ryoma Kamikawa, Goro Tanifuji, Yuichiro Kashiyama, Naohiko Ohkouchi,  
787 John M. Archibald, and Yuji Inagaki. Complete genome of a nonphotosynthetic cyanobacterium  
788 in a diatom reveals recent adaptations to an intracellular lifestyle. *Proceedings of the National*  
789 *Academy of Sciences of the United States of America*, 111(31):11407–11412, 2014.
- 790 [86] Yasukazu Nakamura, Takakazu Kaneko, Shusei Sato, Mamoru Mimuro, Hideaki Miyashita, Tohru  
791 Tsuchiya, Shigemi Sasamoto, Akiko Watanabe, Kumiko Kawashima, Yoshie Kishida, Chiaki  
792 Kiyokawa, Mitsuyo Kohara, Midori Matsumoto, Ai Matsuno, Naomi Nakazaki, Sayaka Shimpo,  
793 Chie Takeuchi, Manabu Yamada, and Satoshi Tabata. Complete genome structure of *gloeobacter*  
794 *violaceus* pcc 7421, a cyanobacterium that lacks thylakoids. *DNA Research*, 10(4):137–145, 2003.



- 795 [87] Julia Holtzendorff, Frédéric Partensky, Daniella Mella, Jean-François Lennon, Wolfgang R Hess,  
796 and Laurence Garczarek. Genome streamlining results in loss of robustness of the circadian clock  
797 in the marine cyanobacterium *Prochlorococcus marinus* PCC 9511. *Journal of Biological Rhythms*,  
798 23(3):187–199, 2008.
- 799 [88] Ryan K Shultzaberger, Joseph S Boyd, Takeo Katsuki, Susan S Golden, and Ralph J Greenspan.  
800 Single mutations in *sasa* enable a simpler  $\delta$ cica gene network architecture with equivalent circadian  
801 properties. *Proceedings of the National Academy of Sciences of the United States of America*,  
802 111(47):E5069–75, 2014.
- 803 [89] Volodymyr Dvornyk. Molecular evolution of *ldpA*, a gene mediating the circadian input signal in  
804 cyanobacteria. *Journal of Molecular Evolution*, 60(1):105–112, 2005.
- 805 [90] Mitsunori Katayama, Takao Kondo, Jin Xiong, S Susan, and Susan S Golden. *ldpA* Encodes  
806 an Iron-Sulfur Protein Involved in Light-Dependent Modulation of the Circadian Period in the  
807 Cyanobacterium *Synechococcus elongatus* PCC 7942. *Journal of Bacteriology*, 185(4):1415–1422,  
808 2003.
- 809 [91] H. Min, H. Guo, and J. Xiong. Rhythmic gene expression in a purple photosynthetic bacterium,  
810 *rhodospira rubra*. *FEBS Letters*, 579(3):808–12, 2005.
- 811 [92] T. Nishiwaki-Ohkawa, Y. Kitayama, E. Ochiai, and T. Kondo. Exchange of *adp* with *atp* in the *cii*  
812 *atpase* domain promotes autophosphorylation of cyanobacterial clock protein *kaic*. *Proceedings of*  
813 *the National Academy of Sciences of the United States of America*, 111(12):4455–60, 2014.
- 814 [93] G. Dong, Q. Yang, Q. Wang, Y. I. Kim, T. L. Wood, K. W. Osteryoung, A. van Oudenaarden,  
815 and S. S. Golden. Elevated *atpase* activity of *kaic* applies a circadian checkpoint on cell division in  
816 *synechococcus elongatus*. *Cell*, 140(4):529–39, 2010.
- 817 [94] Y. Taniguchi, N. Takai, M. Katayama, T. Kondo, and T. Oyama. Three major output path-  
818 ways from the *kaiabc*-based oscillator cooperate to generate robust circadian *kaic* expression in  
819 cyanobacteria. *Proceedings of the National Academy of Sciences of the United States of America*,  
820 2010.
- 821 [95] Ioannis Vakonakis, Douglas A. Klewer, Stanly B. Williams, Susan S. Golden, and Andy C. LiWang.  
822 Structure of the n-terminal domain of the circadian clock-associated histidine kinase *sasa*. *Journal*  
823 *of Molecular Biology*, 342(1):9–17, 2004.
- 824 [96] Yanmei Shi, Gene W Tyson, John M Eppley, and Edward F DeLong. Integrated metatranscriptomic  
825 and metagenomic analyses of stratified microbial assemblages in the open ocean. *The ISME Journal*,  
826 5(6):999–1013, 2011.
- 827 [97] Annegret Wilde and Yukako Hihara. Transcriptional and posttranscriptional regulation of  
828 cyanobacterial photosynthesis. *Biochimica et Biophysica Acta - Bioenergetics*, 2015.
- 829 [98] Ryan K. Shultzaberger, Joseph S. Boyd, Spencer Diamonad, Ralph J. Greenspan, and Susan S.  
830 Golden. Giving time purpose: The *synechococcus elongatus* clock in a broader network context.  
831 *Annual Review of Genetics*, 49(1):485–505, 2015.
- 832 [99] Y. Liu, N. F. Tsinoremas, C. H. Johnson, N. V. Lebedeva, S. S. Golden, M. Ishiura, and T. Kondo.  
833 Circadian orchestration of gene expression in cyanobacteria. *Genes and Development*, 9(12):1469–  
834 78, 1995.
- 835 [100] Mark A. Woelfle and Carl Hirschie Johnson. No promoter left behind: Global circadian gene  
836 expression in cyanobacteria. *Journal of Biological Rhythms*, 21(6):419–431, 2006.
- 837 [101] H. Ito, M. Mutsuda, Y. Murayama, J. Tomita, N. Hosokawa, K. Terauchi, C. Sugita, M. Sugita,  
838 T. Kondo, and H. Iwasaki. Cyanobacterial daily life with *kai*-based circadian and diurnal genome-  
839 wide transcriptional control in *synechococcus elongatus*. *Proceedings of the National Academy of*  
840 *Sciences of the United States of America*, 106(33):14168–73, 2009.
- 841 [102] S Rao Jammalamadaka and Ashis SenGupta. *Topics in Circular Statistics*. World Scientific, 2001.

- 842 [103] Christian Beck, Stefanie Hertel, Anne Rediger, Robert Lehmann, Anika Wiegard, Adrian Kölsch,  
843 Beate Heilmann, Jens Georg, Wolfgang R. Hess, and Ilka M. Axmann. Daily expression pattern of  
844 protein-encoding genes and small noncoding RNAs in *synechocystis* sp. strain PCC 6803. *Applied*  
845 *and Environmental Microbiology*, 80(17):5195–5206, 2014.
- 846 [104] Otilia Cheregi, Cosmin Sicora, Peter B. Kos, Peter J. Nixon, and Imre Vass. The ftsh protease  
847 is required for the repair of photosystem ii in the cyanobacterium *synechocystis*6803 damaged uv-b  
848 radiation. *BMC Plant Biology*, 5(1):1–2, 2005.
- 849 [105] S. Jacobshagen, J. R. Whetstine, and J. M. Boling. Many but not all genes in *chlamydomonas*  
850 *reinhardtii* are regulated by the circadian clock. *Plant Biology*, 3(6):592–597, 2001.
- 851 [106] Stacey L. Harmer, John B. Hogenesch, Marty Straume, Hur-Song Chang, Bin Han, Tong Zhu, Xun  
852 Wang, Joel A. Kreps, and Steve A. Kay. Orchestrated transcription of key pathways in *arabidopsis*  
853 by the circadian clock. *Science*, 290(5499):2110–2113, 2000.
- 854 [107] Yukihiro Kabeya, Hiromitsu Nakanishi, Kenji Suzuki, Takanari Ichikawa, Youichi Kondou, Minami  
855 Matsui, and Shin-ya Miyagishima. The ylmg protein has a conserved function related to the  
856 distribution of nucleoids in chloroplasts and cyanobacteria. *BMC Plant Biology*, 10(1):1–13, 2010.
- 857 [108] K. Imai, T. Nishiwaki, T. Kondo, and H. Iwasaki. Circadian rhythms in the synthesis and degrada-  
858 tion of a master clock protein *kaic* in cyanobacteria. *Journal of Biological Chemistry*, 279(35):36534–  
859 9, 2004.
- 860 [109] Hideo Iwasaki, Taeko Nishiwaki, Yohko Kitayama, Masato Nakajima, and Takao Kondo. KaiA-  
861 stimulated KaiC phosphorylation in circadian timing loops in cyanobacteria. *Proceedings of the*  
862 *National Academy of Sciences of the United States of America*, 99(24):15788–93, 2002.
- 863 [110] D. Zwicker, D. K. Lubensky, and P. R. Ten Wolde. Robust circadian clocks from coupled protein-  
864 modification and transcription-translation cycles. *Proceedings of the National Academy of Sciences*  
865 *of the United States of America*, 107(52):22540–5, 2010.
- 866 [111] Danish Memon, Abhay K. Singh, Himadri B. Pakrasi, and Pramod P. Wangikar. A global analysis  
867 of adaptive evolution of operons in cyanobacteria. *Antonie van Leeuwenhoek*, 103(2):331–346, 2013.
- 868 [112] M. Ishiura, S. Kutsuna, S. Aoki, H. Iwasaki, C. R. Andersson, A. Tanabe, S. S. Golden, C. H.  
869 Johnson, and T. Kondo. Expression of a gene cluster *kaiabc* as a circadian feedback process in  
870 cyanobacteria. *Science*, 281(5382):1519–23, 1998.
- 871 [113] Vikram Vijayan, Rick Zuzow, and Erin K O’Shea. Oscillations in supercoiling drive circadian gene  
872 expression in cyanobacteria. *Proceedings of the National Academy of Sciences of the United States*  
873 *of America*, 106(52):22564–8, 2009.
- 874 [114] J. Stöckel, Eric a Welsh, Michelle Liberton, Rangesh Kunnvakkam, Rajeev Aurora, and Himadri B.  
875 Pakrasi. Global transcriptomic analysis of cyanothecce 51142 reveals robust diurnal oscillation of  
876 central metabolic processes. *Proceedings of the National Academy of Sciences of the United States*  
877 *of America*, 105(16):6156–6161, 2008.
- 878 [115] Jörg Toepel, Eric Welsh, Tina C. Summerfield, Himadri B. Pakrasi, and Louis A. Sherman. Dif-  
879 ferential transcriptional analysis of the cyanobacterium *Cyanothecce* sp. strain ATCC 51142 during  
880 light-dark and continuous-light growth. *Journal of Bacteriology*, 190(11):3904–3913, 2008.
- 881 [116] Tatsuya Uzumaki, Masayasu Fujita, Toru Nakatsu, Fumio Hayashi, Hiroyuki Shibata, Noriyo Itoh,  
882 Hiroaki Kato, and Masahiro Ishiura. Crystal structure of the c-terminal clock-oscillator domain of  
883 the cyanobacterial *kaia* protein. *Nature Structural and Molecular Biology*, 11(7):623–631, 2004.
- 884 [117] H Iwasaki, Y Taniguchi, M Ishiura, and T Kondo. Physical interactions among circadian clock  
885 proteins KaiA, KaiB and KaiC in cyanobacteria. *The EMBO Journal*, 18(5):1137–1145, 1999.
- 886 [118] M. Egli, R. Pattanayek, J. H. Sheehan, Y. Xu, T. Mori, J. A. Smith, and C. H. Johnson. Loop-loop  
887 interactions regulate *kaia*-stimulated *kaic* phosphorylation in the cyanobacterial *kaiabc* circadian  
888 clock. *Biochemistry*, 52(7):1208–20, 2013.

- 889 [119] Y. Xu, T. Mori, R. Pattanayek, S. Pattanayek, M. Egli, and C. H. Johnson. Identification of  
890 key phosphorylation sites in the circadian clock protein kaic by crystallographic and mutage-  
891 netic analyses. *Proceedings of the National Academy of Sciences of the United States of America*,  
892 101(38):13933–8, 2004.
- 893 [120] T. Nishiwaki, Y. Satomi, M. Nakajima, C. Lee, R. Kiyohara, H. Kageyama, Y. Kitayama,  
894 M. Temamoto, A. Yamaguchi, A. Hijikata, M. Go, H. Iwasaki, T. Takao, and T. Kondo. Role  
895 of kaic phosphorylation in the circadian clock system of *synechococcus elongatus* pcc 7942. *Pro-*  
896 *ceedings of the National Academy of Sciences of the United States of America*, 101(38):13927–32,  
897 2004.
- 898 [121] I. Vakonakis and A. C. LiWang. Structure of the c-terminal domain of the clock protein kaia in  
899 complex with a kaic-derived peptide: implications for kaic regulation. *Proceedings of the National*  
900 *Academy of Sciences of the United States of America*, 101(30):10925–30, 2004.
- 901 [122] Detlef D. Leipe, L. Aravind, Nick V. Grishin, and Eugene V. Koonin. The bacterial replicative  
902 helicase dnab evolved from a reca duplication. *Genome Research*, 10(1):5–16, 2000.
- 903 [123] Maria Loza-Correa, Tobias Sahr, Monica Rolando, Craig Daniels, Pierre Petit, Tania Skarina,  
904 Laura Gomez Valero, Delphine Dervins-Ravault, Nadine Honoré, Aleksey Savchenko, and Carmen  
905 Buchrieser. The *Legionella pneumophila* kai operon is implicated in stress response and confers  
906 fitness in competitive environments. *Environmental Microbiology*, 16(2):359–381, 2014.
- 907 [124] R. Pattanayek, J. Wang, T. Mori, Y. Xu, C. H. Johnson, and M. Egli. Visualizing a circadian clock  
908 protein: crystal structure of kaic and functional insights. *Molecular Cell*, 15(3):375–88, 2004.
- 909 [125] J. E. Walker, M. Saraste, M. J. Runswick, and N. J. Gay. Distantly related sequences in the alpha-  
910 and beta-subunits of atp synthase, myosin, kinases and other atp-requiring enzymes and a common  
911 nucleotide binding fold. *The EMBO Journal*, 1(8):945–51, 1982.
- 912 [126] M. Egli, T. Mori, R. Pattanayek, Y. Xu, X. Qin, and C. H. Johnson. Dephosphorylation of the core  
913 clock protein kaic in the cyanobacterial kaiabc circadian oscillator proceeds via an atp synthase  
914 mechanism. *Biochemistry*, 51(8):1547–58, 2012.
- 915 [127] Y. Kitayama, T. Nishiwaki-Ohkawa, Y. Sugisawa, and T. Kondo. Kaic intersubunit communication  
916 facilitates robustness of circadian rhythms in cyanobacteria. *Nature Communications*, 4:2897, 2013.
- 917 [128] R. Pattanayek, Y. Xu, A. Lamichhane, C. H. Johnson, and M. Egli. An arginine tetrad as mediator  
918 of input-dependent and input-independent atpases in the clock protein kaic. *Acta Crystallographica*  
919 *Section D: Biological Crystallography*, 70(Pt 5):1375–90, 2014.
- 920 [129] R. Pattanayek, T. Mori, Y. Xu, S. Pattanayek, C. H. Johnson, and M. Egli. Structures of kaic  
921 circadian clock mutant proteins: a new phosphorylation site at t426 and mechanisms of kinase,  
922 atpase and phosphatase. *PLoS One*, 4(11):e7529, 2009.
- 923 [130] Y. Xu, T. Mori, X. Qin, H. Yan, M. Egli, and C. H. Johnson. Intramolecular regulation of phos-  
924 phorylation status of the circadian clock protein kaic. *PLoS One*, 4(11):e7509, 2009.
- 925 [131] Annemarie Neuner, Holger W. Jannasch, Shimshon Belkin, and Karl O. Stetter. *Thermococcus*  
926 *litoralis* sp. nov.: A new species of extremely thermophilic marine archaeobacteria. *Archives of*  
927 *Microbiology*, 153(2):205–207, 1990.
- 928 [132] Juan M. Gonzalez, Yaeko Masuchi, Frank T. Robb, James W. Ammerman, Dennis L. Maeder, Miki  
929 Yanagibayashi, Jin Tamaoka, and Chiaki Kato. *Pyrococcus horikoshii* sp. nov., a hyperthermophilic  
930 archaeon isolated from a hydrothermal vent at the okinawa trough. *Extremophiles*, 2:123–130, 1998.
- 931 [133] Erik R. Zinser, Debbie Lindell, Zackary I. Johnson, Matthias E. Futschik, Claudia Steglich, Mau-  
932 reen L. Coleman, Matthew A. Wright, Trent Rector, Robert Steen, Nathan McNulty, Luke R.  
933 Thompson, and Sallie W. Chisholm. Choreography of the transcriptome, photophysiology, and cell  
934 cycle of a minimal photoautotroph, *Prochlorococcus*. *PLoS One*, 4(4), 2009.
- 935 [134] Cécile Straub, Philippe Quillardet, Julia Vergalli, Nicole Tandeau de Marsac, and Jean Francois  
936 Humbert. A day in the life of *microcystis aeruginosa* strain pcc 7806 as revealed by a transcriptomic  
937 analysis. *PLoS One*, 6(1), 2011.
